# Supplementary material for: Synthesis and spectroscopic behaviour of metal complexes of meso-alkylidenyl carbaporphyrinoids and their expanded analogues
Source: Royal Society of Chemistry journal article supplement (doi:10.1039/c5dt04566e), 2016-01-01
Supplement: c5dt04566e1.pdf [file c5dt04566e1.pdf]

Supplementary Information

Synthesis and spectroscopic behaviour of metal complexes of *meso*-alkylidenyl carbaporphyrinoids and their expanded analogue

*Abeje Abebayehu, Dowoo Park, Seonah Hwang, Ranjan Dutta and Chang-Hee Lee\**

*Department of Chemistry and Institute of Basic Science, Kangwon National University,  
Chun-Chon 200-701 Korea,  
[chhlee@kangwon.ac.kr](mailto:chhlee@kangwon.ac.kr)*

**Table of contents**

|                                                                                                                                                     |         |
|-----------------------------------------------------------------------------------------------------------------------------------------------------|---------|
| Scheme .....                                                                                                                                        | S2      |
| <sup>1</sup> H NMR, <sup>13</sup> C NMR, and MALDI-TOF mass spectrum of <b>5</b> in CDCl <sub>3</sub> .....                                         | S3-S5   |
| UV-Vis absorption titration profile of <b>5</b> upon the addition of TFA.....                                                                       | S6      |
| Comparative UV-Vis absorption spectra of <b>5</b> , <b>4</b> and <b>3</b> in acetonitrile.....                                                      | S6      |
| <sup>1</sup> H NMR and <sup>1</sup> H NMR spectral changes of <b>7a</b> upon addition of 30 equiv. of TFA in CDCl <sub>3</sub> .....                | S7      |
| <sup>13</sup> C NMR, and MALDI-TOF mass spectrum of complex <b>7a</b> .....                                                                         | S8      |
| <sup>1</sup> H - <sup>1</sup> H COSY and partial region of <sup>1</sup> H - <sup>1</sup> H COSY spectrum of <b>7a</b> in CDCl <sub>3</sub> .....    | S9      |
| <sup>1</sup> H - <sup>13</sup> C HSQC and selected region of <sup>1</sup> H - <sup>13</sup> C HSQC spectrum of <b>7a</b> in CDCl <sub>3</sub> ..... | S10     |
| <sup>1</sup> H - <sup>13</sup> C HMBC partial region of <sup>1</sup> H - <sup>13</sup> C HMBC spectrum of <b>7a</b> in CDCl <sub>3</sub> .....      | S11     |
| Solid state structure of complex <b>7a</b> .....                                                                                                    | S12     |
| <sup>1</sup> H NMR and MALDI-TOF mass spectrum of complex <b>7c</b> .....                                                                           | S12-S13 |
| <sup>1</sup> H NMR and MALDI-TOF mass spectrum of complex <b>7d</b> .....                                                                           | S13-S14 |
| <sup>1</sup> H NMR, <sup>13</sup> C NMR and MALDI-TOF mass spectrum of complex <b>8</b> .....                                                       | S14-S15 |
| <sup>1</sup> H - <sup>1</sup> H COSY and Selected region of <sup>1</sup> H - <sup>1</sup> H COSY spectrum of <b>8</b> in CDCl <sub>3</sub> .....    | S16     |
| <sup>1</sup> H - <sup>13</sup> C HSQC and partial region of <sup>1</sup> H - <sup>13</sup> C HSQC spectrum of <b>8</b> in CDCl <sub>3</sub> .....   | S17     |
| <sup>1</sup> H - <sup>13</sup> C HMBC and selected region of <sup>1</sup> H - <sup>13</sup> C HMBC spectrum of <b>8</b> in CDCl <sub>3</sub> .....  | S18     |
| Comparative <sup>1</sup> H NMR spectrum of <b>4</b> and complex <b>8</b> in CDCl <sub>3</sub> .....                                                 | S19     |
| <sup>1</sup> H NMR, <sup>13</sup> C NMR and MALDI-TOF mass spectrum of complex <b>9</b> .....                                                       | S20-S21 |
| Comparative <sup>1</sup> H NMR spectrum of <b>4</b> and complex <b>9</b> in CDCl <sub>3</sub> .....                                                 | S21     |
| Comparative UV-Vis absorption spectra of <b>4</b> , complex <b>8</b> and complex <b>9</b> in acetonitrile.....                                      | S22     |
| Crystallographic table for complex <b>7a</b> .....                                                                                                  | S23     |

## Synthetic Scheme

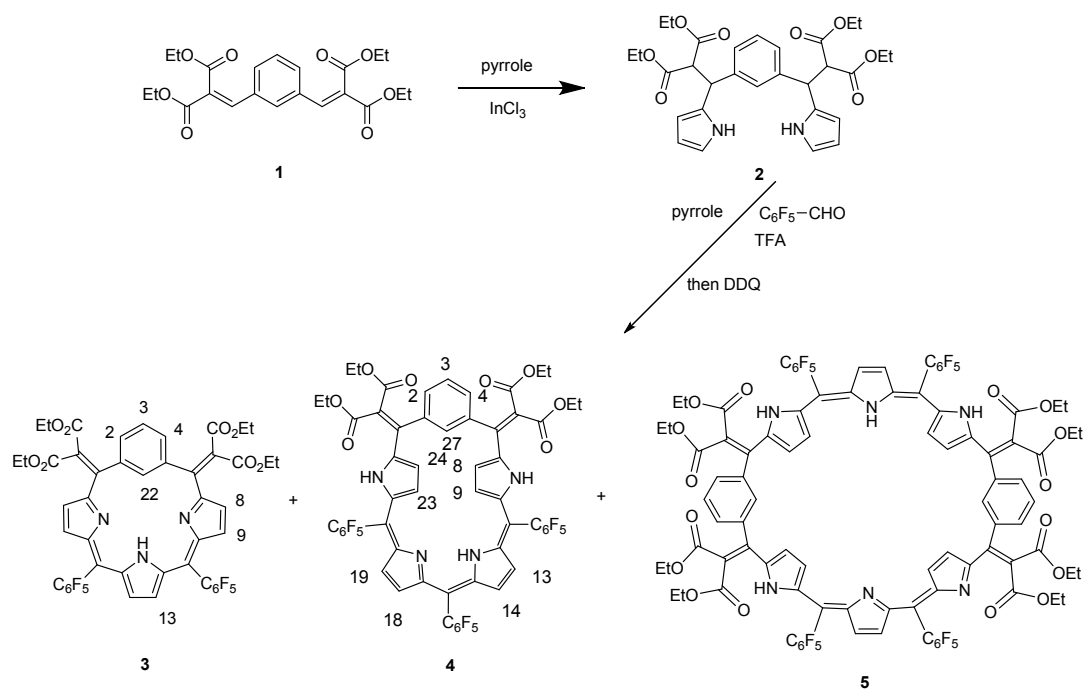

**Fig. 1S:**  $^1\text{H}$  NMR spectrum of compound **5** in  $\text{CDCl}_3$

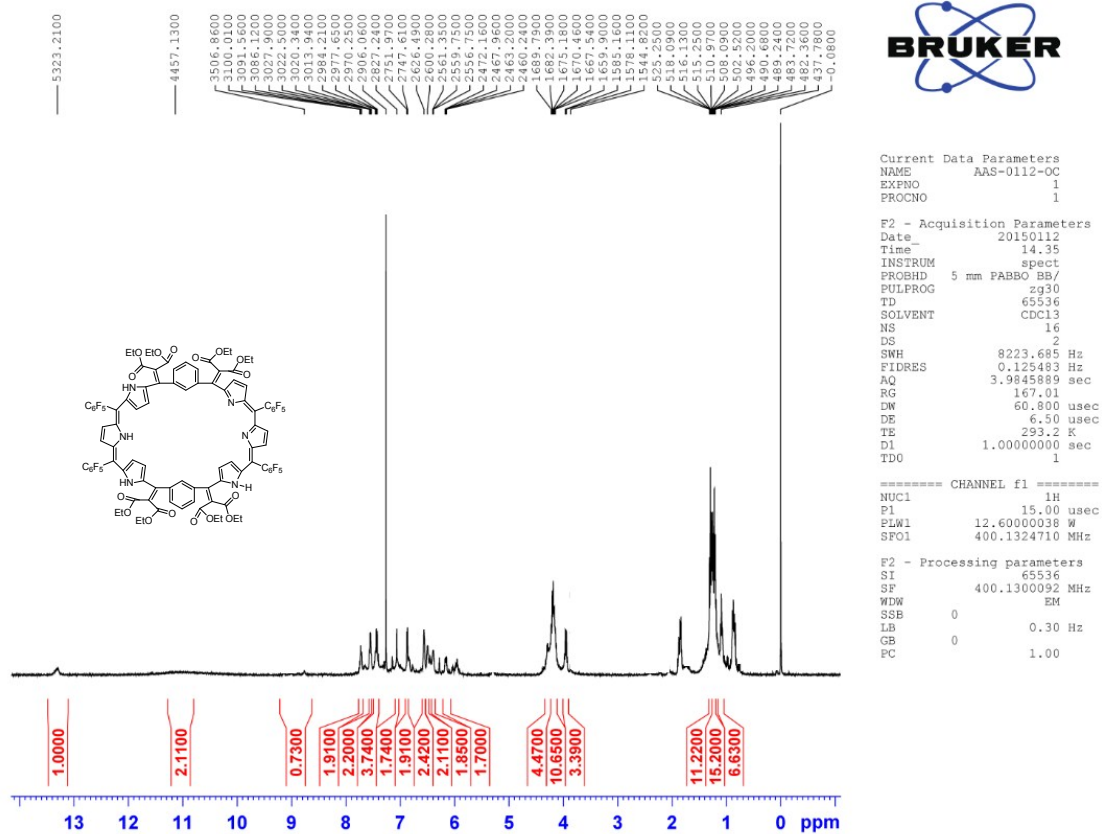

**Fig. 2S:**  $^{13}\text{C}$  NMR spectrum of compound **5** in  $\text{CDCl}_3$

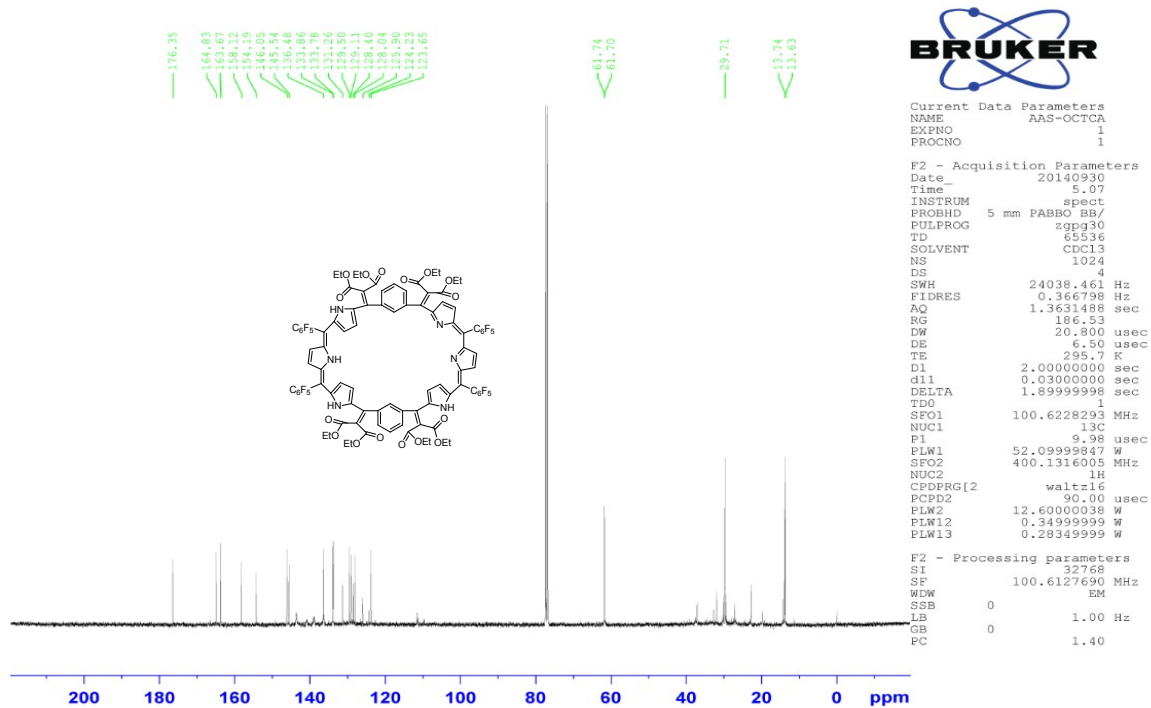

Fig. 3S: MALDI-TOF of compound 5

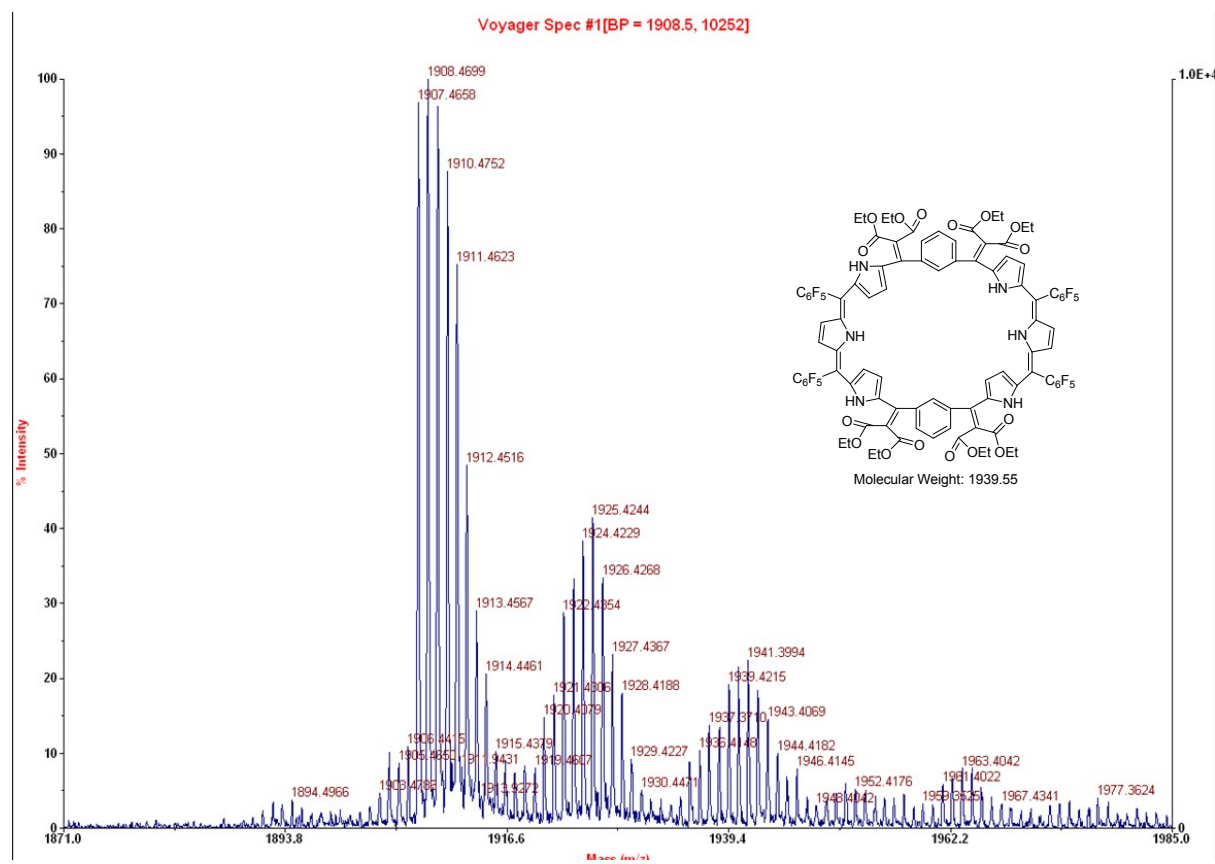

**Fig. 4S:** UV-Vis absorption spectral changes of *m*-benziotaphyrin **5** ( $2.06 \times 10^{-5}$  M, in  $\text{CH}_3\text{CN}$ ) observed upon titration with TFA. The black line corresponds to the spectrum of the free base, while the remaining spectra were recorded at increment of 0.25-100 molar equiv. of TFA.

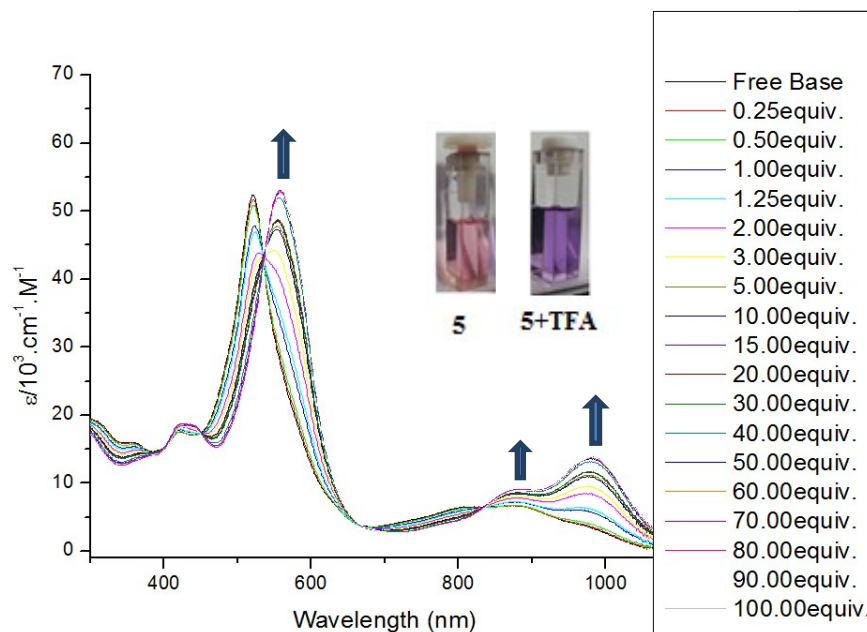

**Fig. 5S:** UV-Vis absorption spectra of *m*-benziotaphyrin **5** (green) ( $20.6 \mu\text{M}$ ), *m*-benzipentaphyrin **4** (red) ( $33.0 \mu\text{M}$ ), *m*-benziporphyrin **3** (black) ( $40.9 \mu\text{M}$ ) in acetonitrile

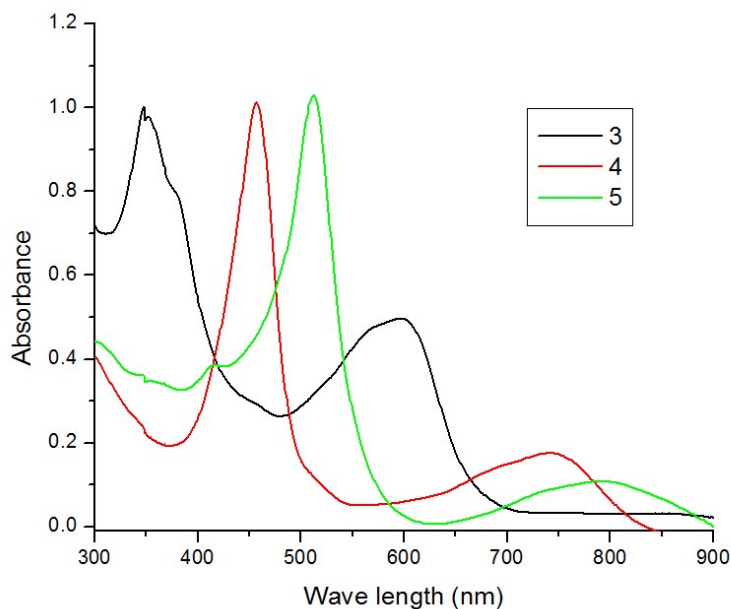

**Fig. 6S:**  $^1\text{H}$  NMR spectrum of complex **7a** in  $\text{CDCl}_3$

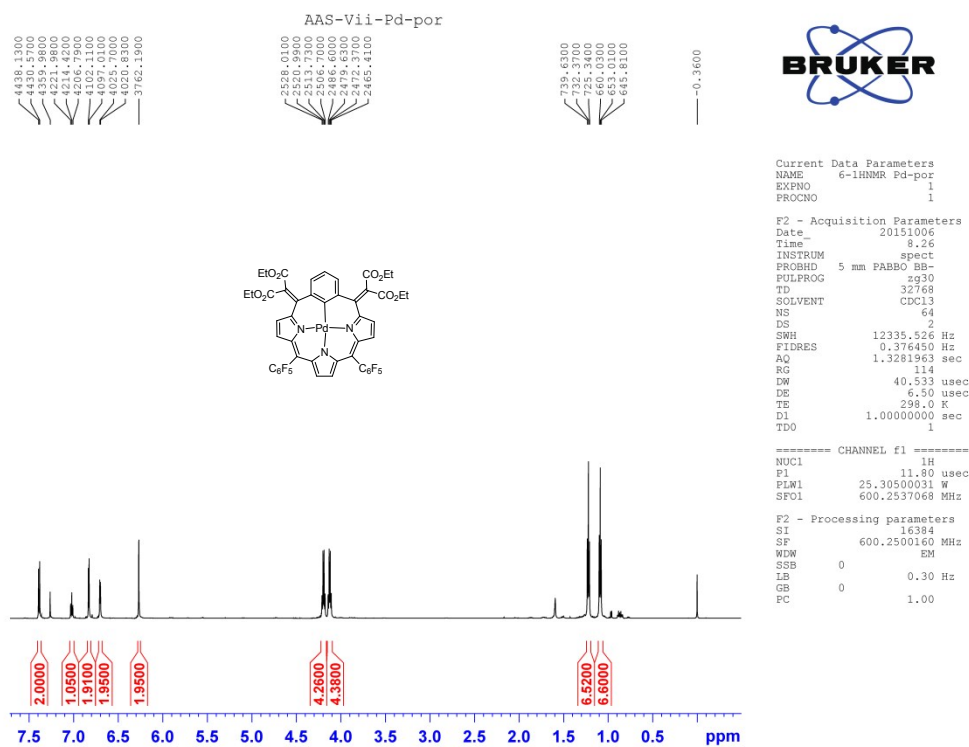

**Fig. 7S:**  $^1\text{H}$  NMR spectrum of complex **7a** after addition of 30 equiv. TFA in  $\text{CDCl}_3$

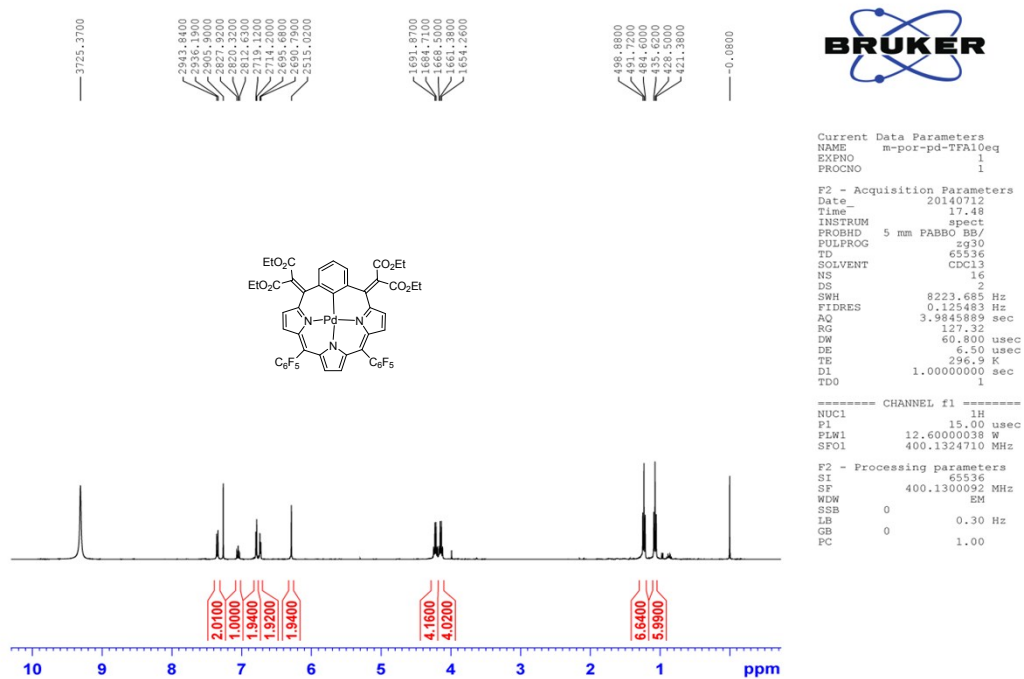

**Fig. 8S:**  $^{13}\text{C}$  NMR spectrum of complex **7a** in  $\text{CDCl}_3$

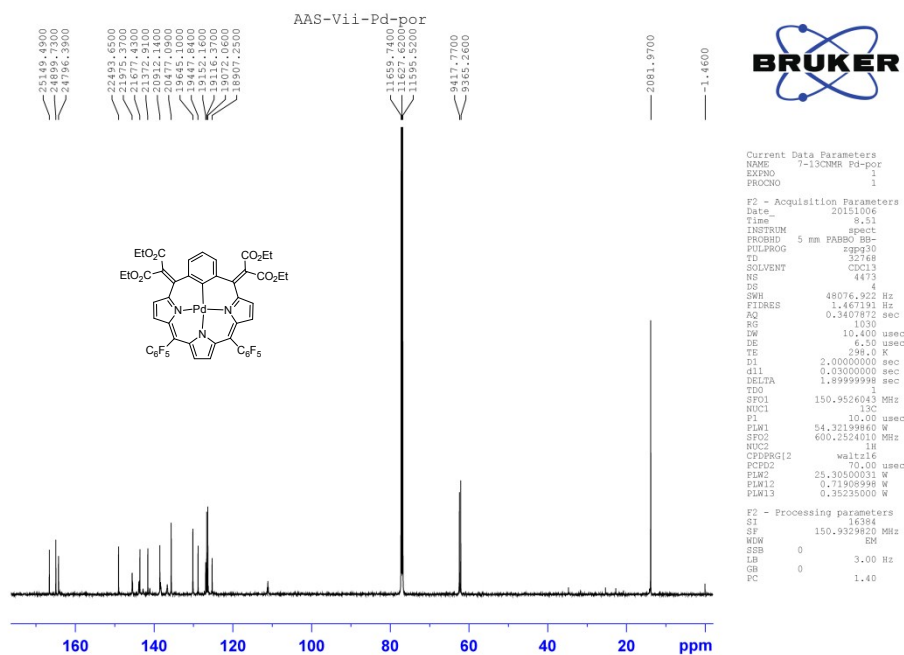

**Fig. 9S:** MALDI-TOF spectrum of complex **7a**

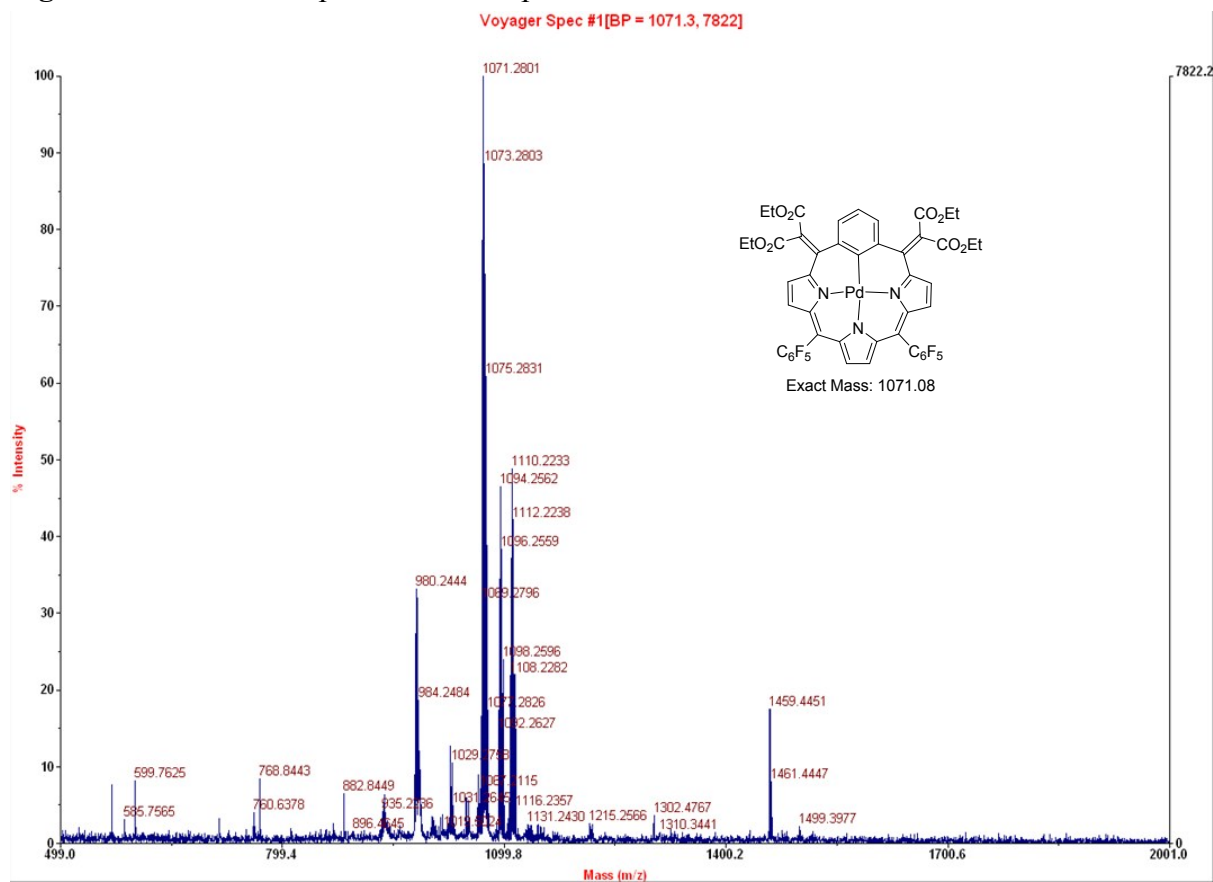



**Fig. 10S:**  $^1\text{H}$  -  $^1\text{H}$  COSY spectrum of **7a** in  $\text{CDCl}_3$

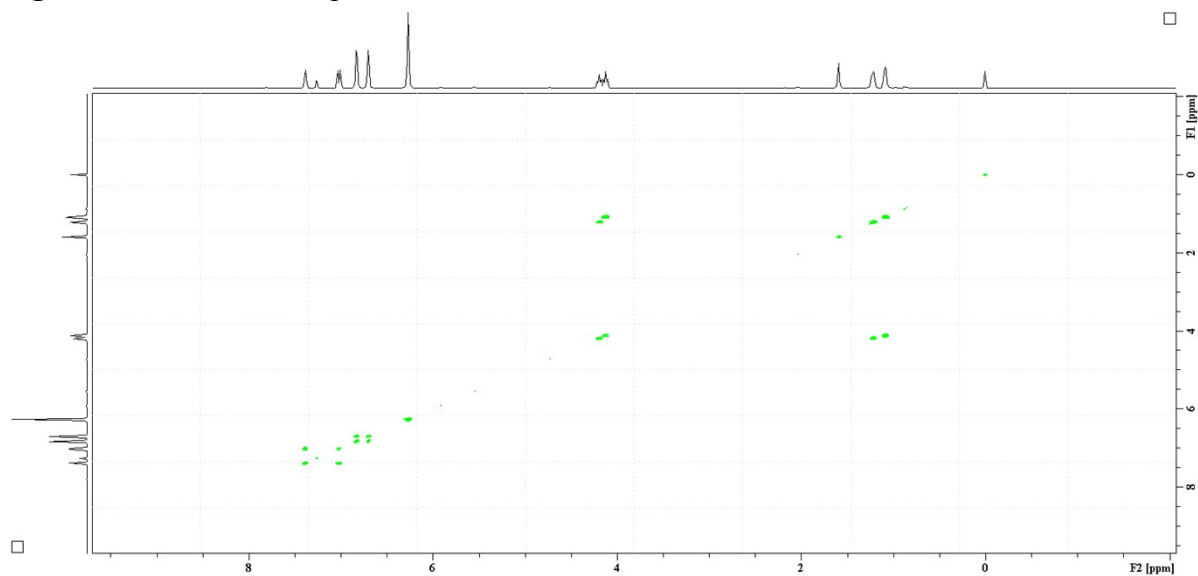

**Fig. 11S:** Partial region of  $^1\text{H}$  -  $^1\text{H}$  COSY spectrum of **7a** in  $\text{CDCl}_3$ .

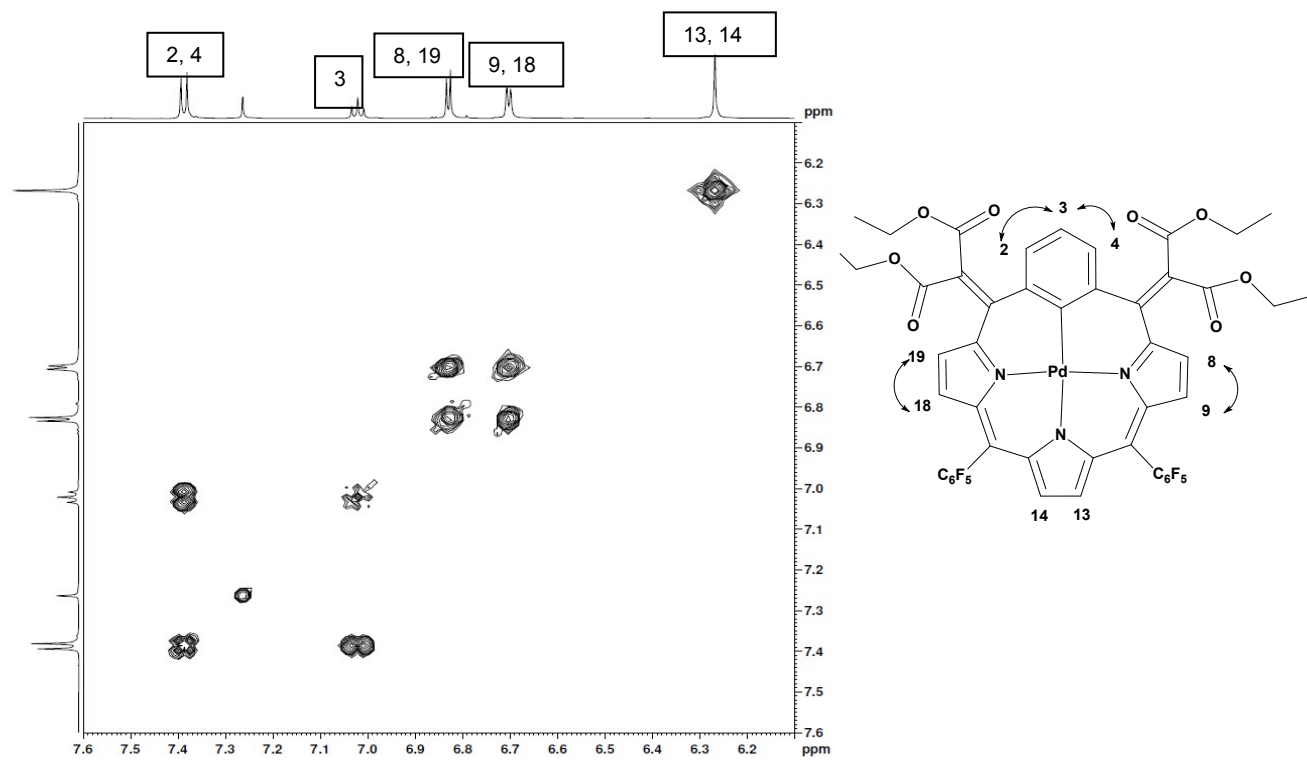

**Fig. 12S:**  $^1\text{H}$  -  $^{13}\text{C}$  HSQC spectrum of **7a** in  $\text{CDCl}_3$ .

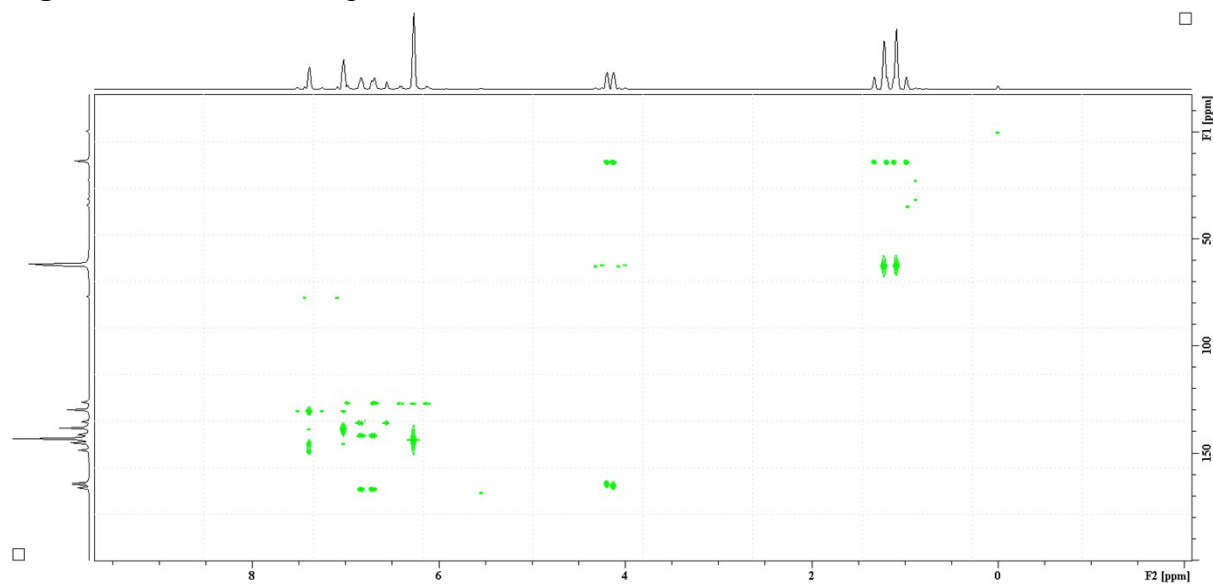

**Fig. 13S:** Selected region of  $^1\text{H}$  -  $^{13}\text{C}$  HSQC spectrum of **7a** in  $\text{CDCl}_3$ .

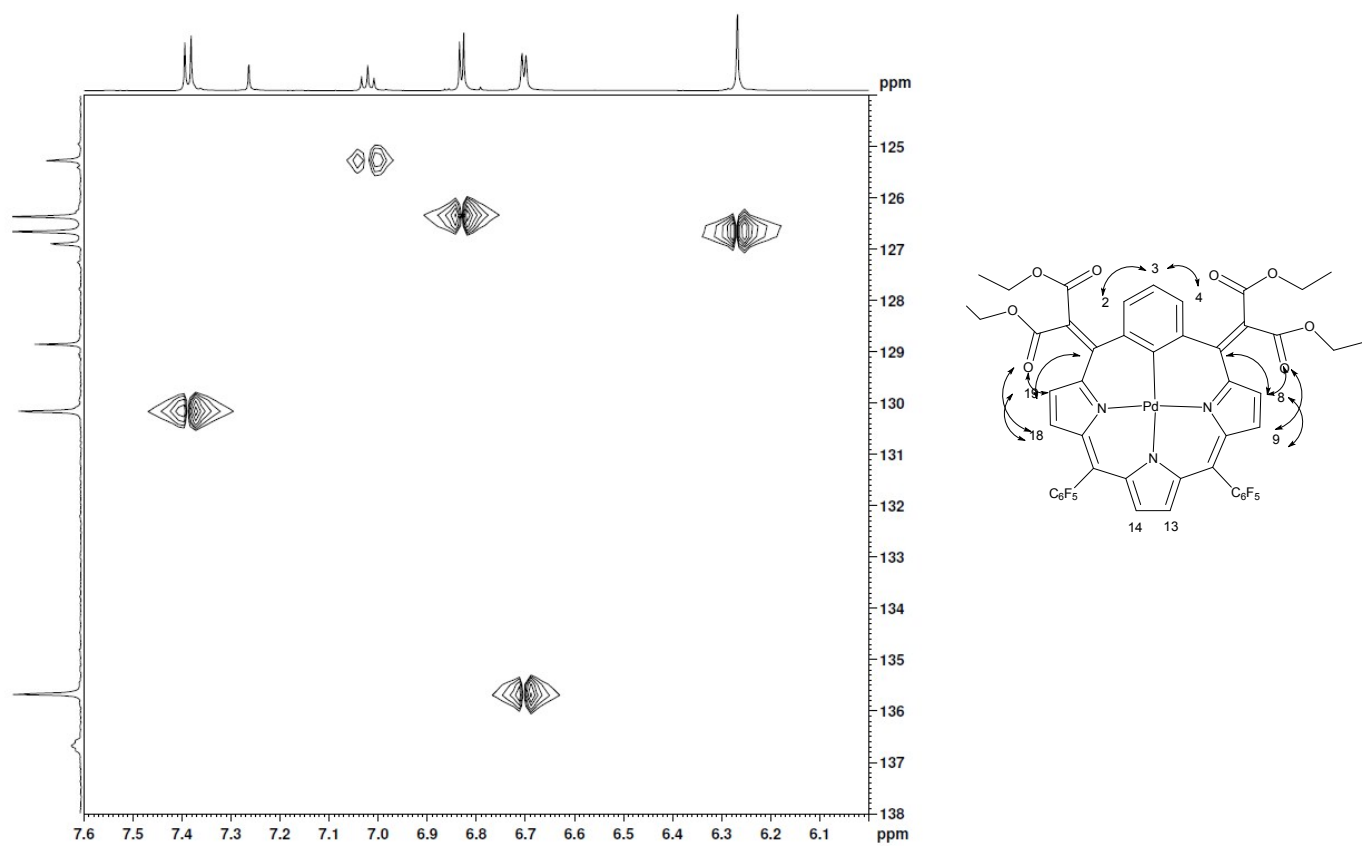

**Fig. 14S:**  $^1\text{H}$  -  $^{13}\text{C}$  HMBC spectrum of **7a** in  $\text{CDCl}_3$ .

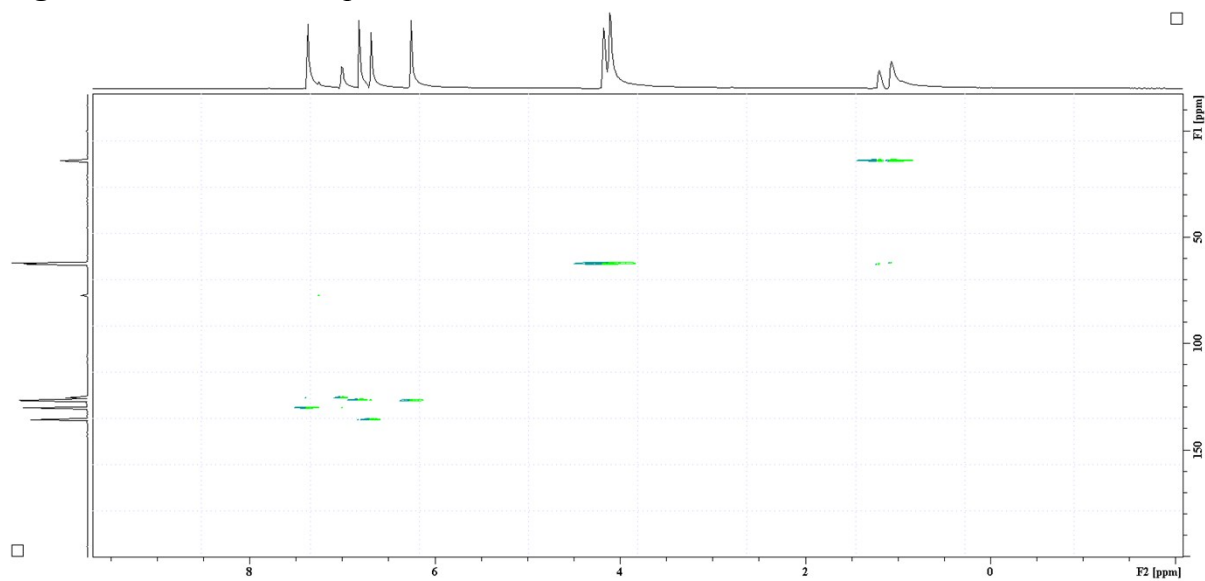

**Fig. 15S:** Partial region of  $^1\text{H}$  -  $^{13}\text{C}$  HMBC spectrum of **7a** in  $\text{CDCl}_3$ .

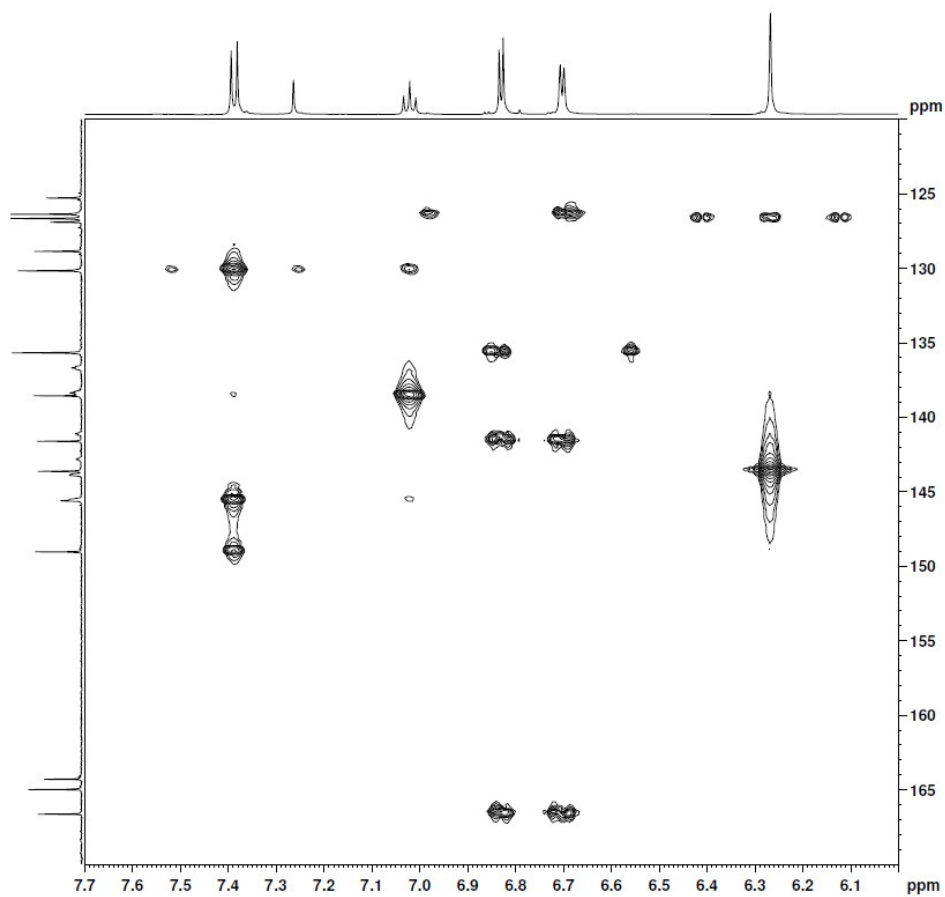

**Fig. 16S:** Solid state structure of Pd-(*m*-benzi) porphyrin **7a** from X-ray diffraction analysis:

A) top view and B) side view

A)

B)

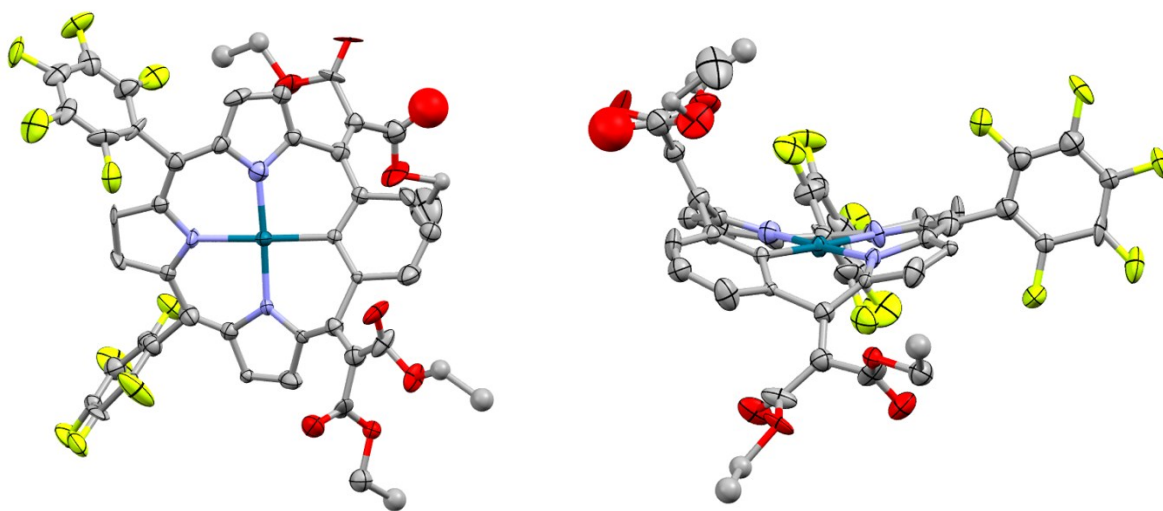

**Fig. 17S:** <sup>1</sup>H NMR spectrum of complex **7c** in CDCl<sub>3</sub>

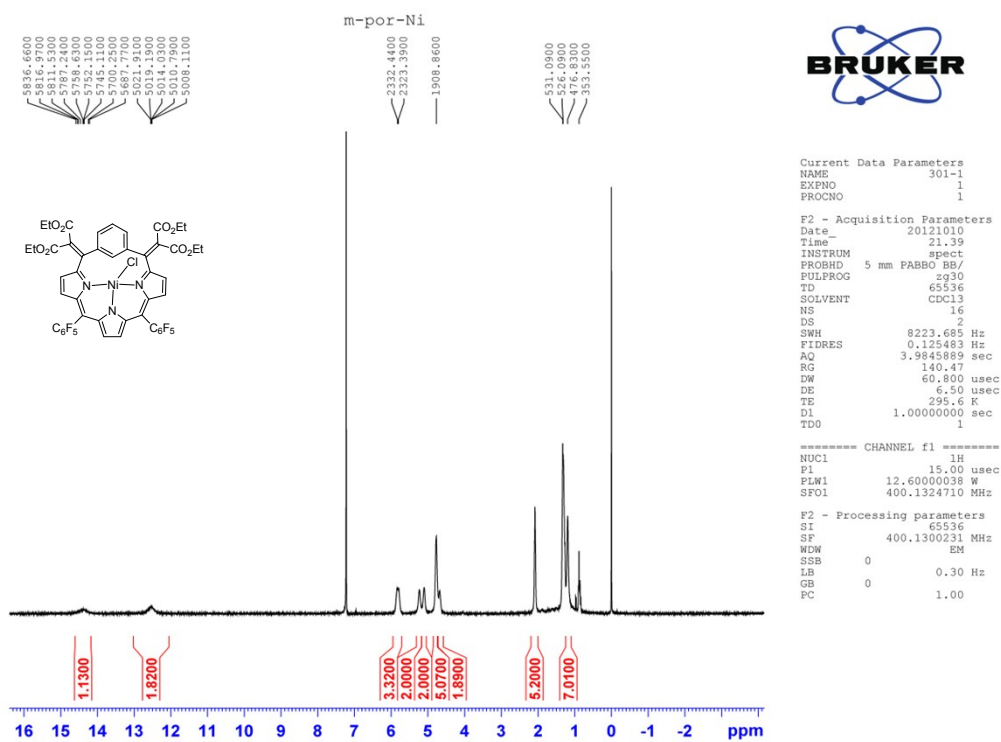

Fig. 18S: MALDI-TOF spectrum of complex 7c

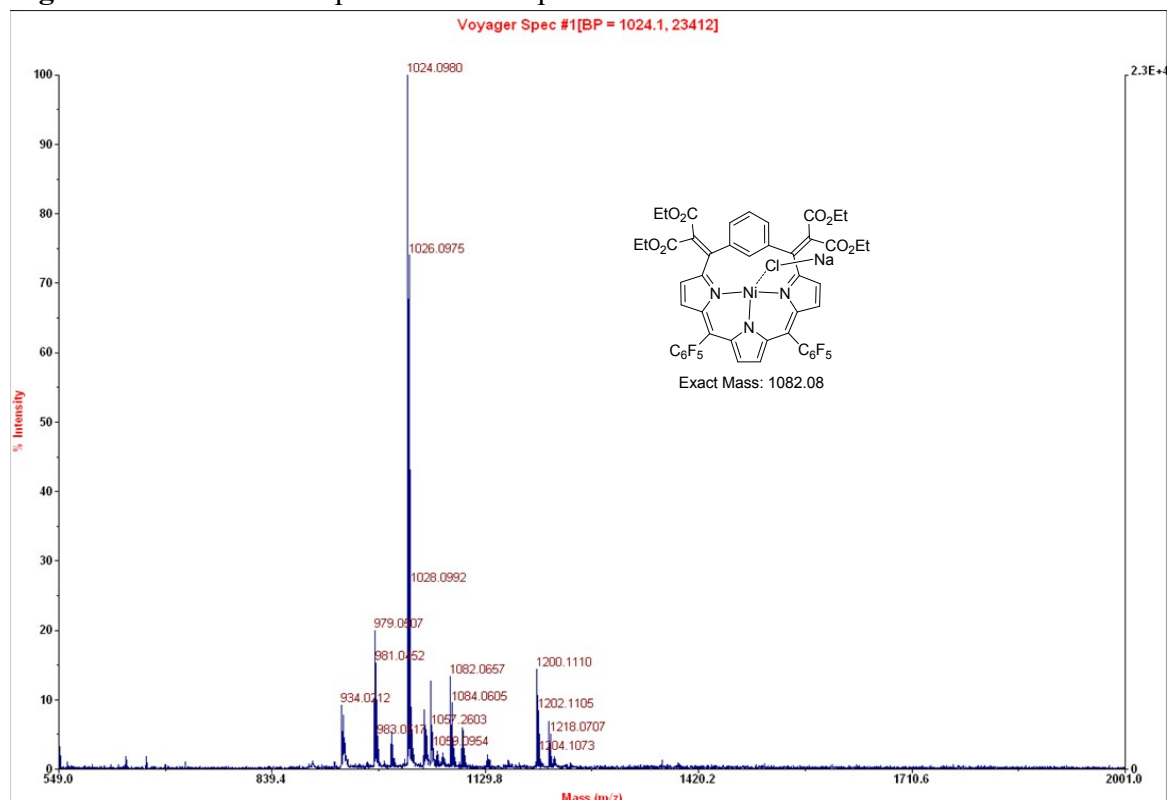

Fig. 19S: <sup>1</sup>H NMR spectrum of complex 7d in CDCl<sub>3</sub>

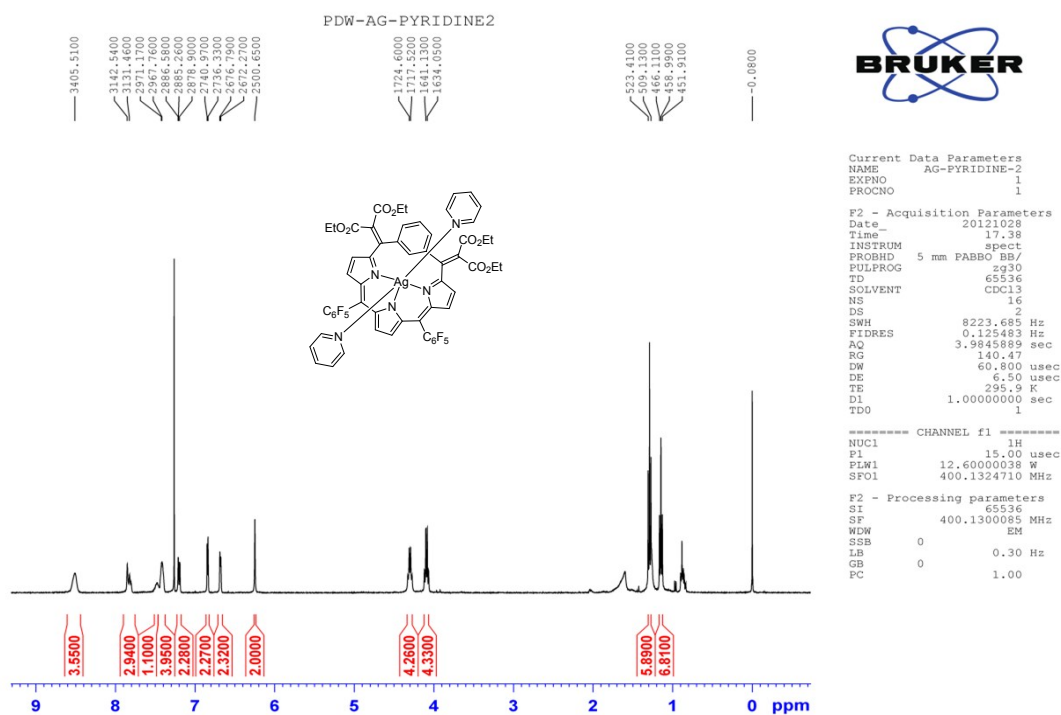

**Fig. 20S:** MALDI-TOF spectrum of complex **7d**

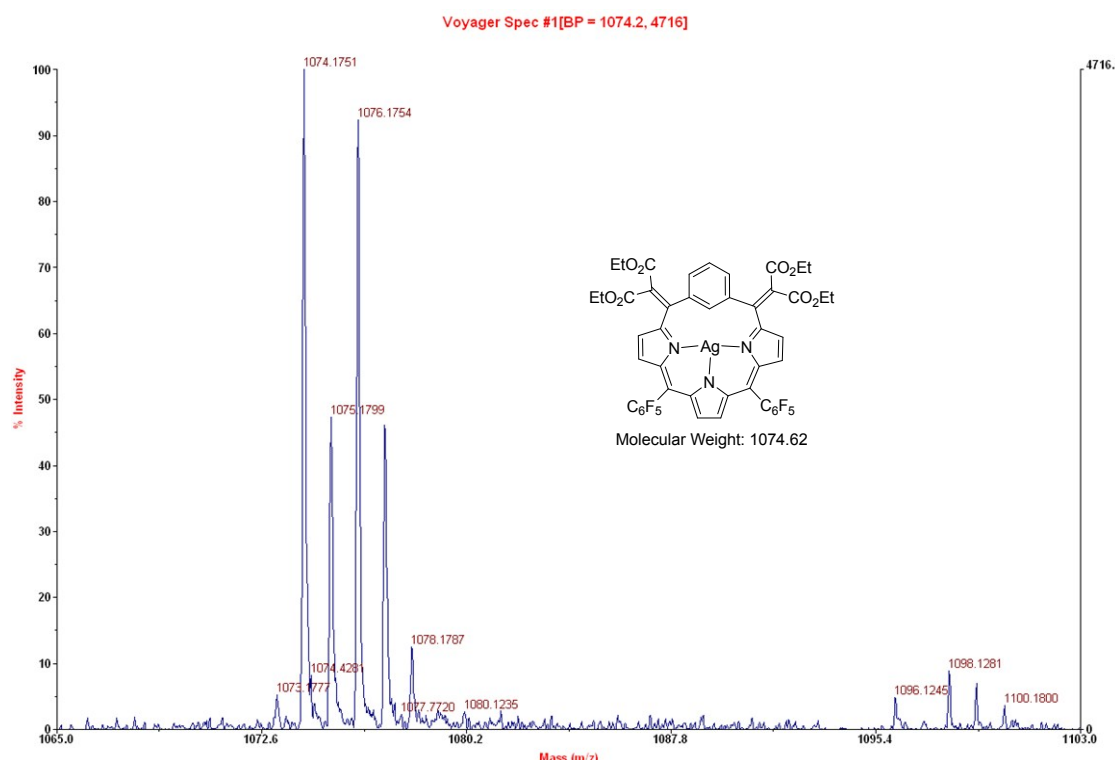

**Fig. 21S:**  $^1\text{H}$  NMR spectrum of complex **8** in  $\text{CDCl}_3$

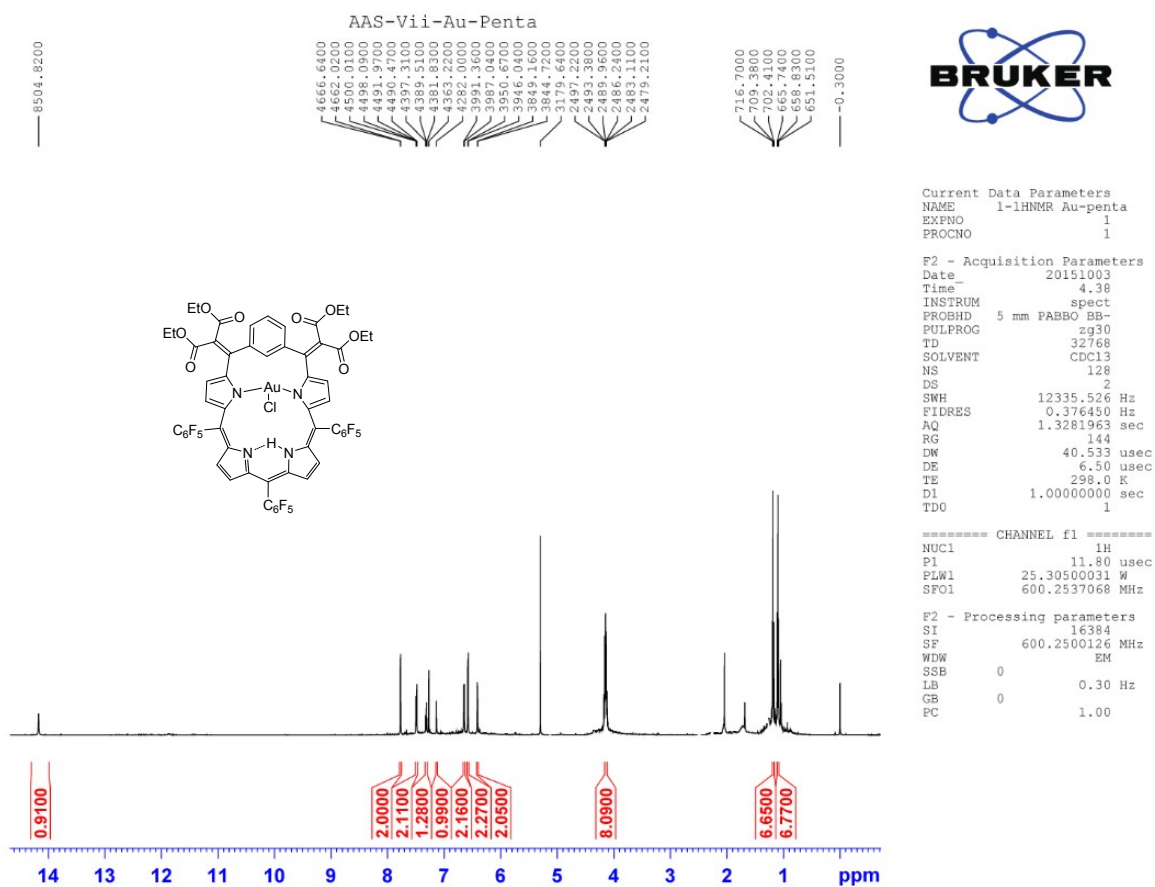

**Fig. 22S:**  $^{13}\text{C}$  NMR spectrum of complex **8** in  $\text{CDCl}_3$

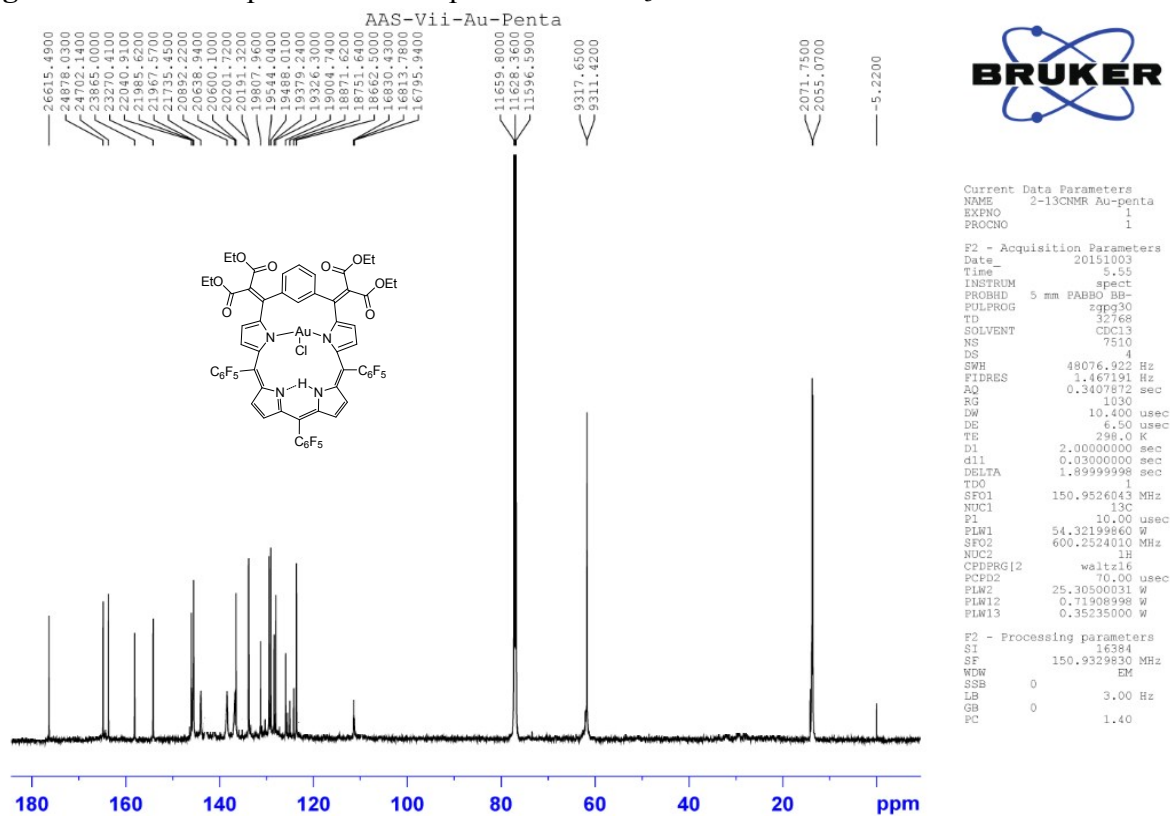

**Fig. 23S:** MALDI-TOF spectrum of complex **8**

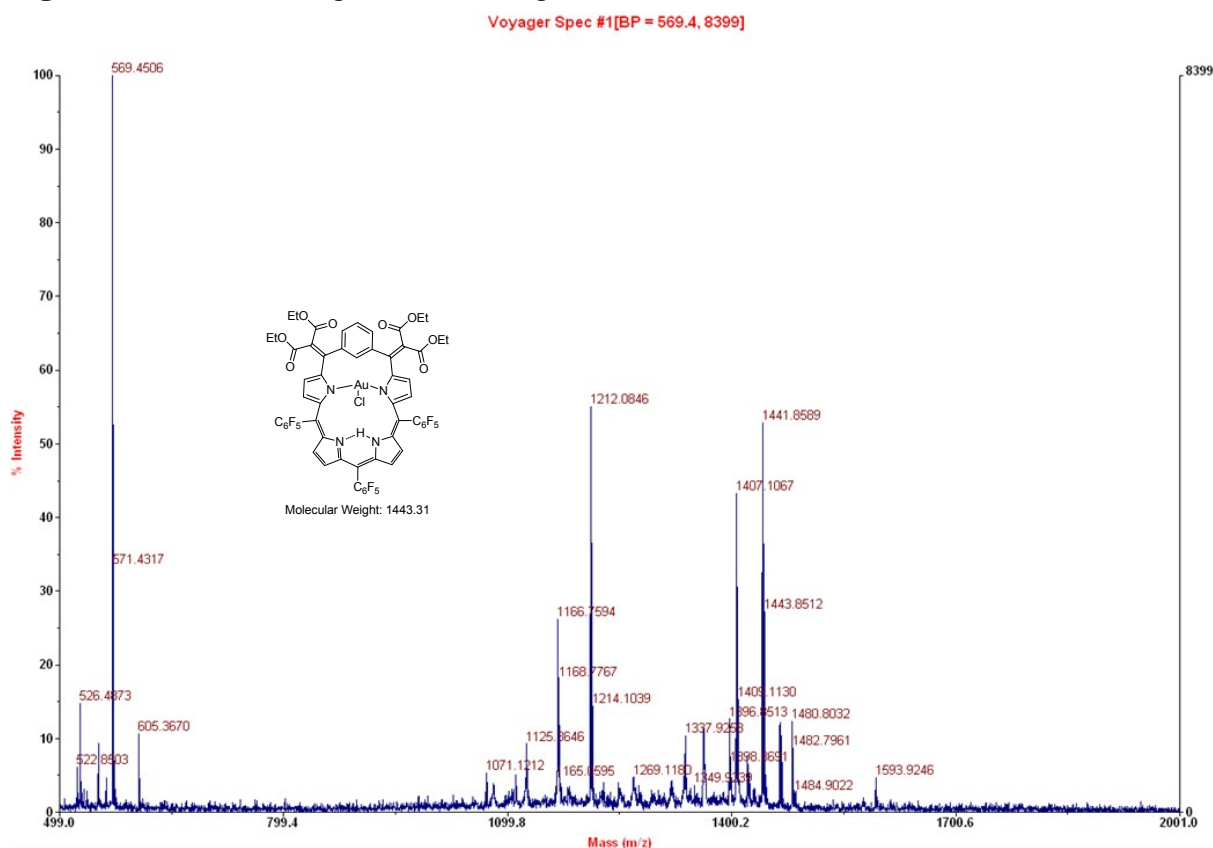

**Fig. 24S:**  $^1\text{H}$  -  $^1\text{H}$  COSY spectrum of **8** in  $\text{CDCl}_3$ .

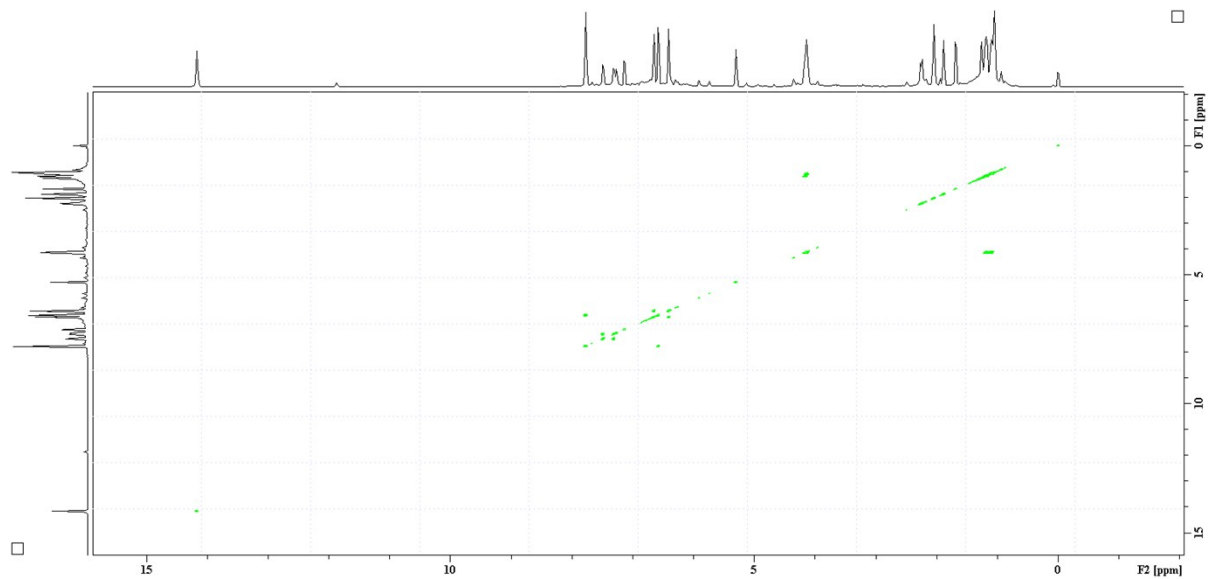

**Fig. 25S:** Selected region of  $^1\text{H}$  -  $^1\text{H}$  COSY spectrum of **8** in  $\text{CDCl}_3$ .

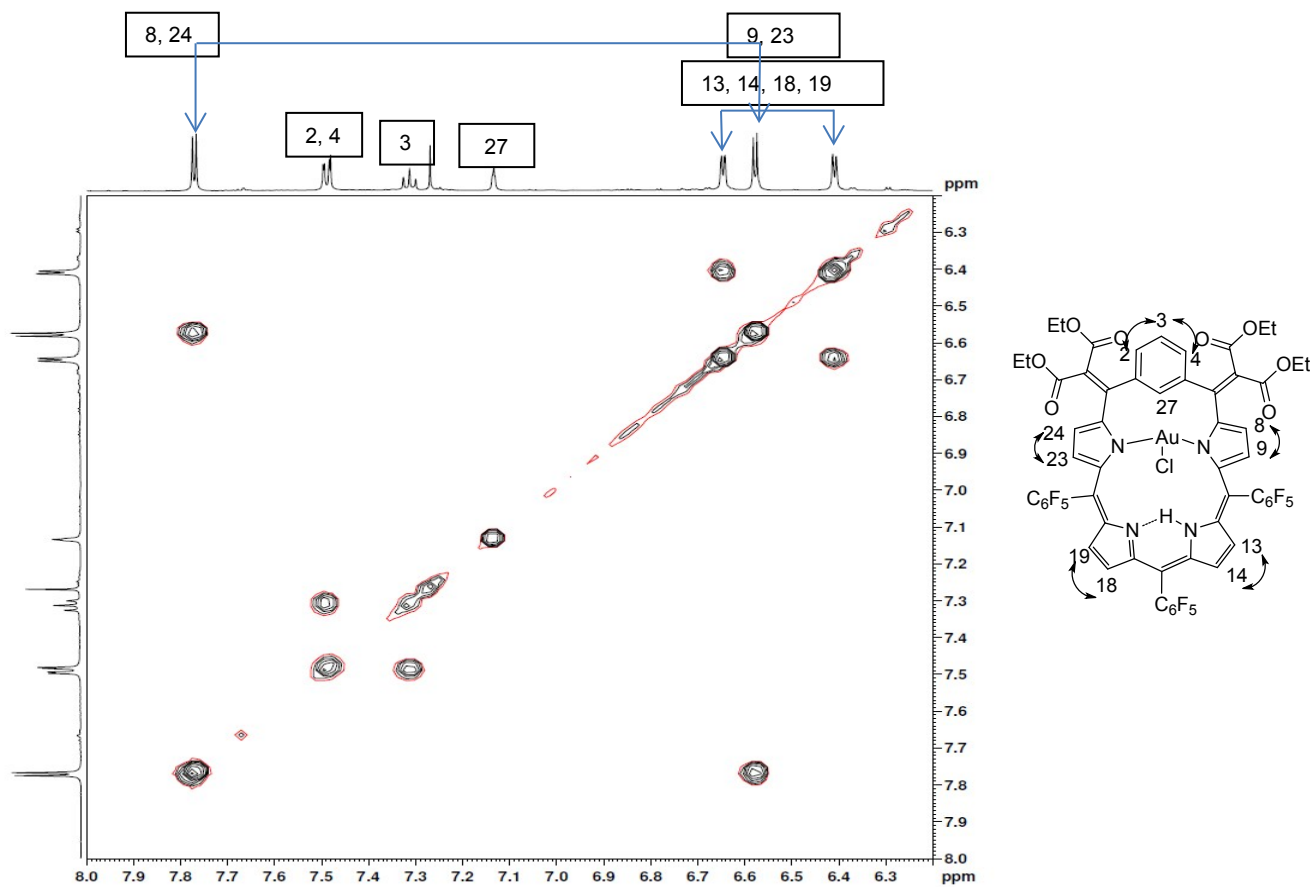



**Fig. 26S:**  $^1\text{H}$  -  $^{13}\text{C}$  HSQC NMR spectrum of **8** in  $\text{CDCl}_3$ .

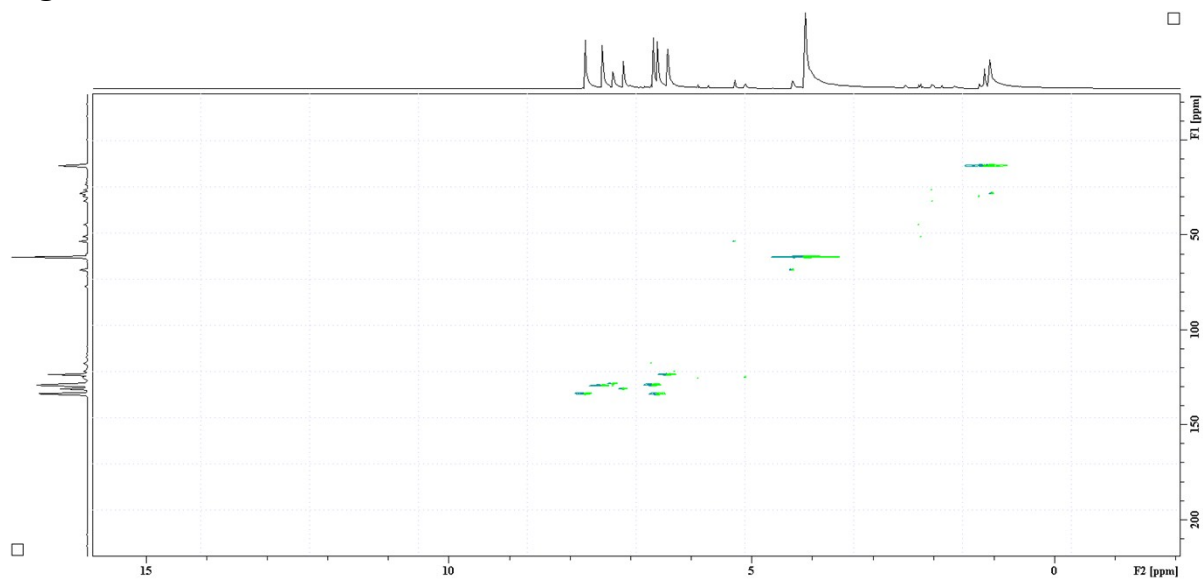

**Fig. 27S:** Partial region of  $^1\text{H}$  -  $^{13}\text{C}$  HSQC spectrum of **8** in  $\text{CDCl}_3$ .

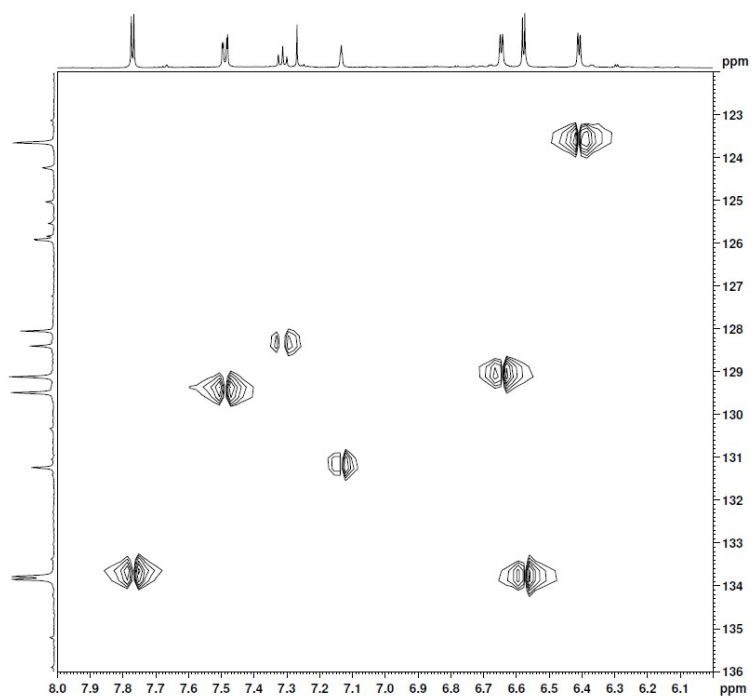

**Fig. 28S:**  $^1\text{H}$  -  $^{13}\text{C}$  HMBC spectrum of **8** in  $\text{CDCl}_3$ .

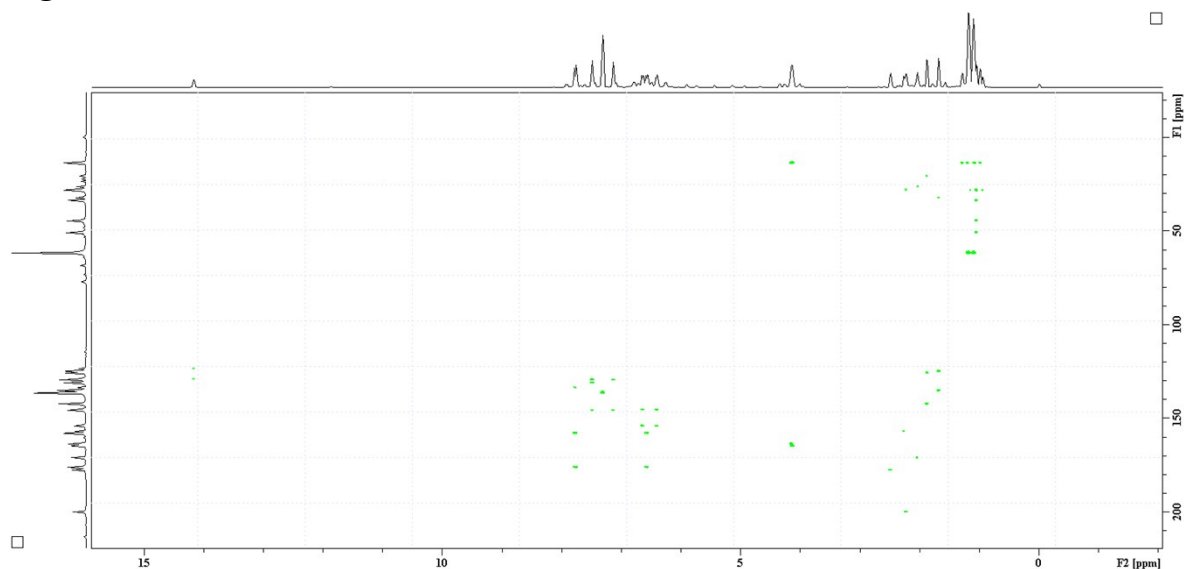

**Fig. 29S:** Selected region of  $^1\text{H}$  -  $^{13}\text{C}$  HMBC spectrum of **8** in  $\text{CDCl}_3$ .

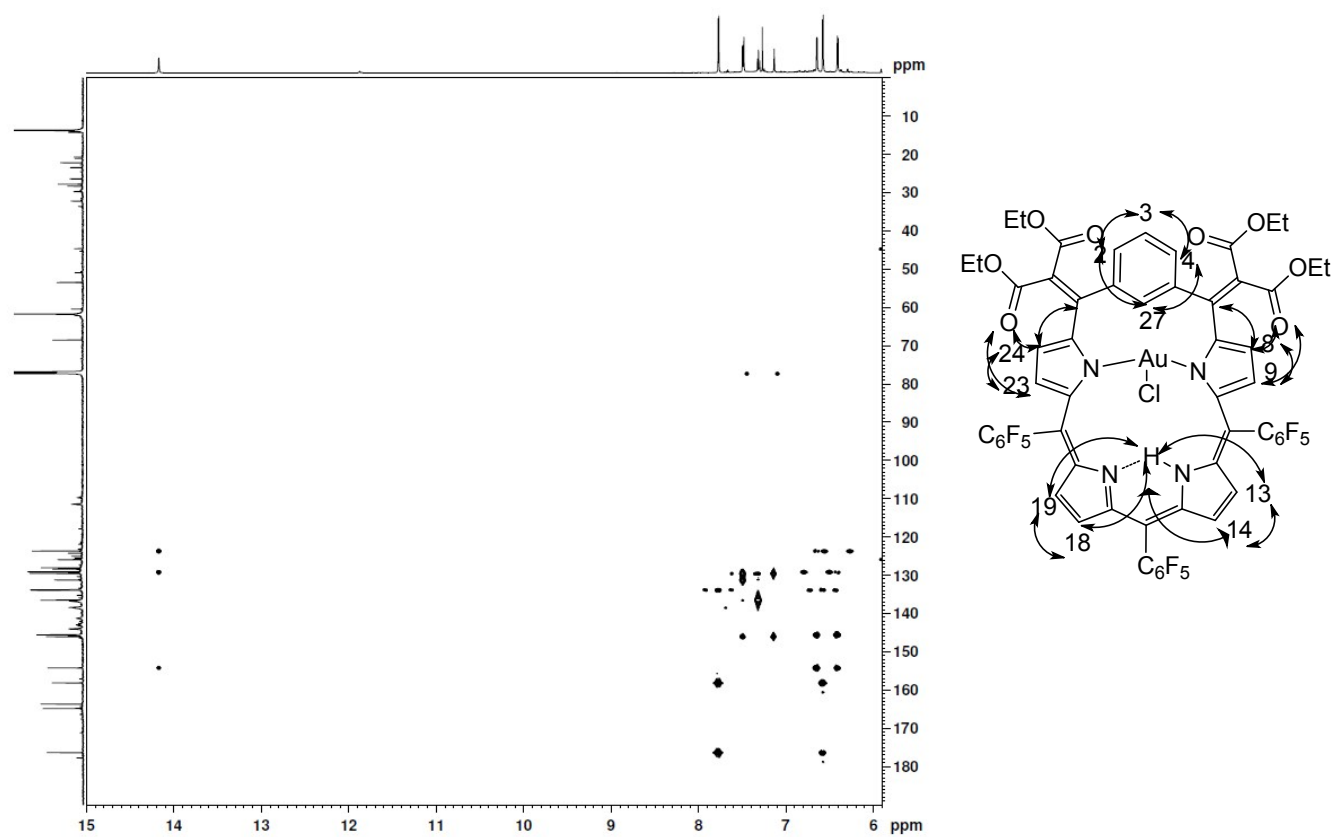

**Fig. 30S:** Comparative  $^1\text{H}$  NMR spectra of **4** (top) and Au(III) complex **8** (bottom,  $\text{CDCl}_3$ , 300 K)

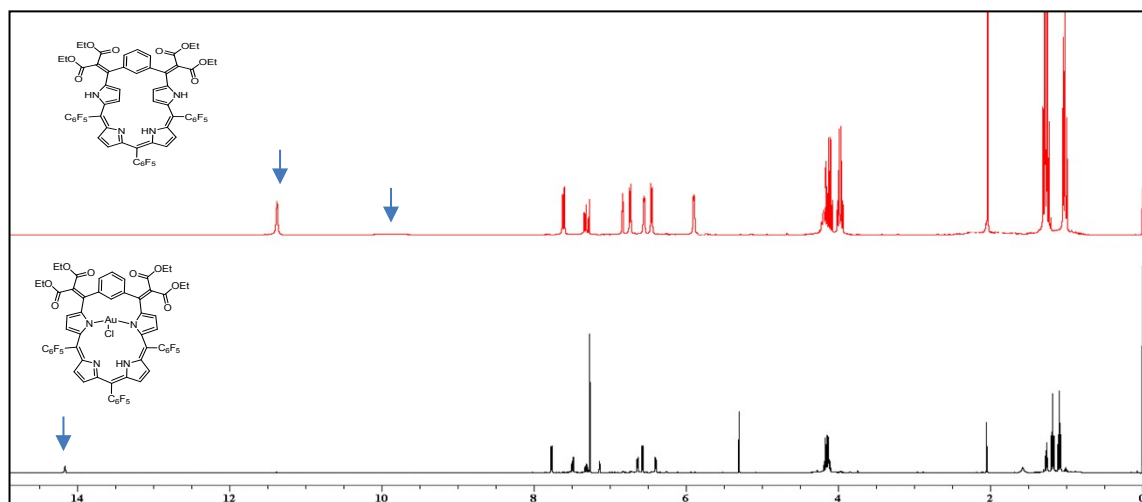

Expanded aromatic region of comparative  $^1\text{H}$  NMR spectra

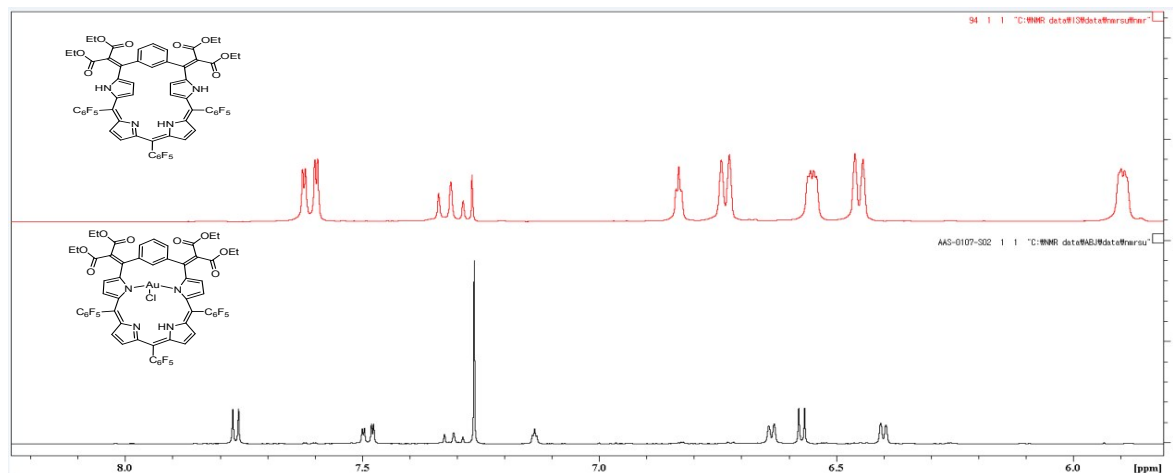

Expanded aliphatic region of comparative  $^1\text{H}$  NMR spectra

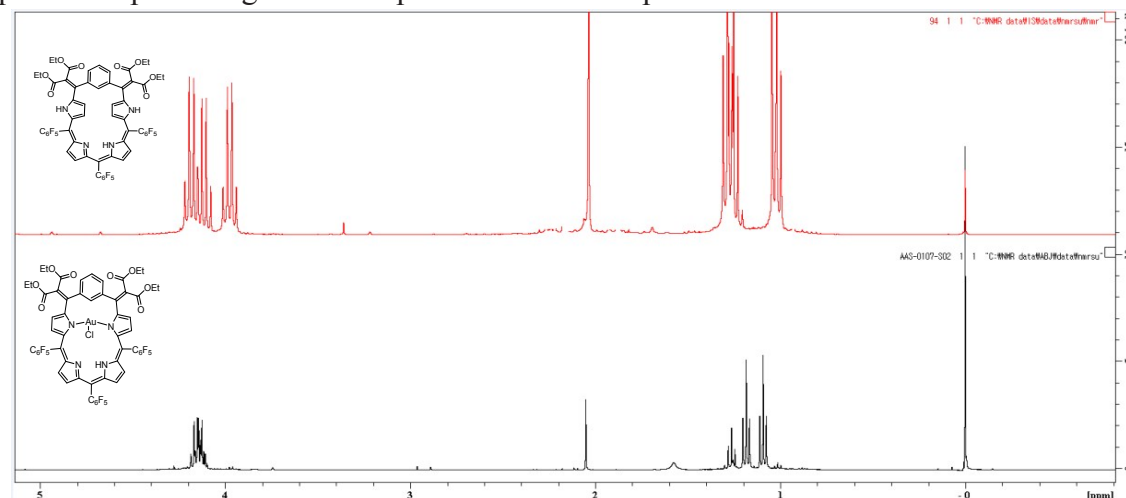

**Fig. 31S:**  $^1\text{H}$  NMR spectrum of complex **9** in  $\text{CDCl}_3$

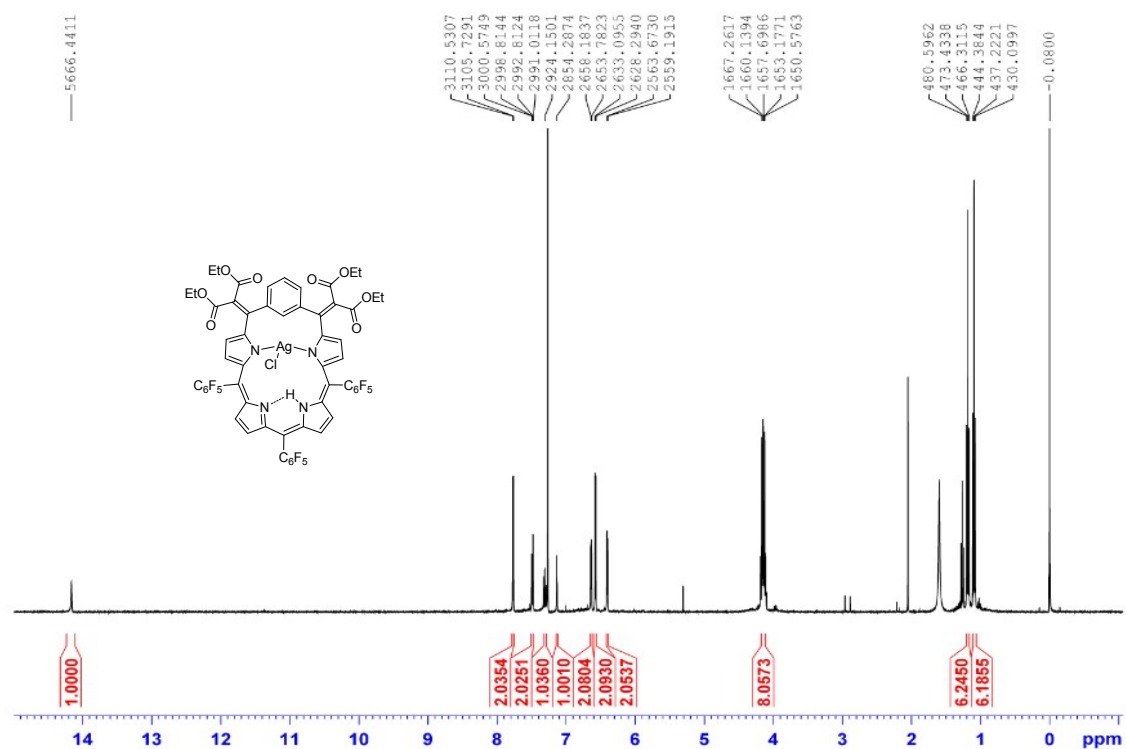

**Fig. 32S:**  $^{13}\text{C}$  NMR spectrum of complex **9** in  $\text{CDCl}_3$

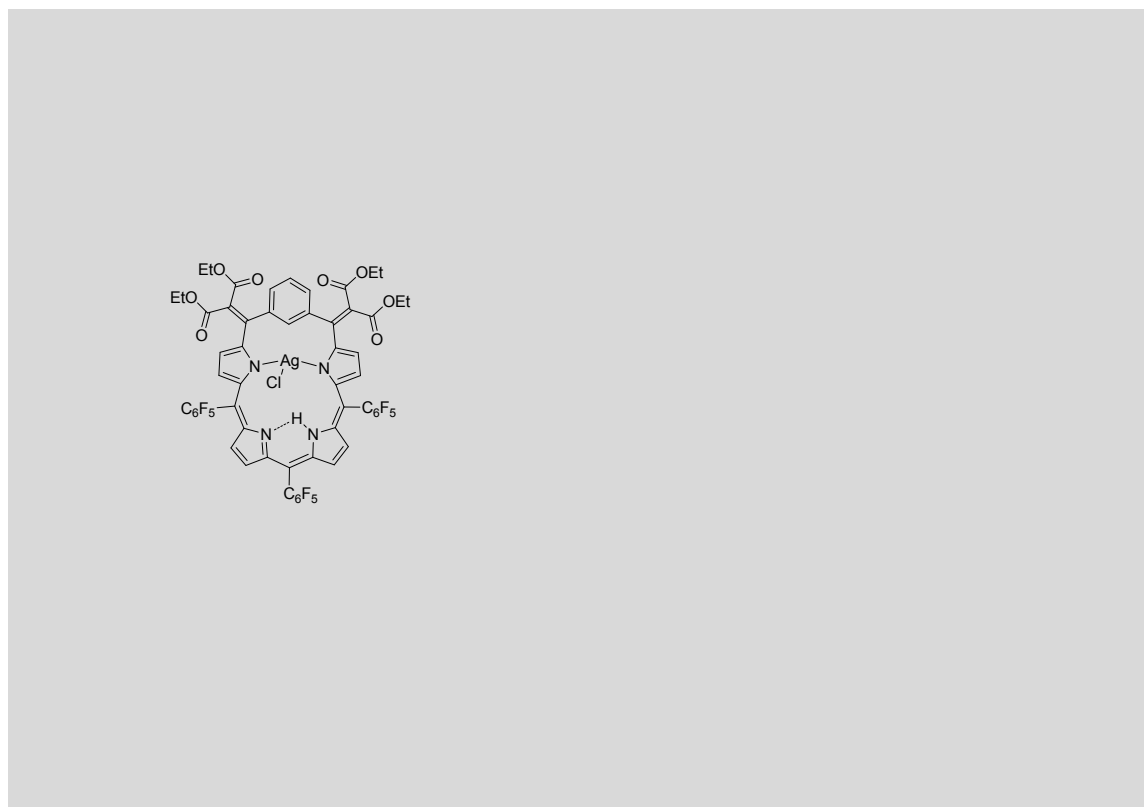

**Fig. 33S:** MALDI-TOF spectrum of complex **9**

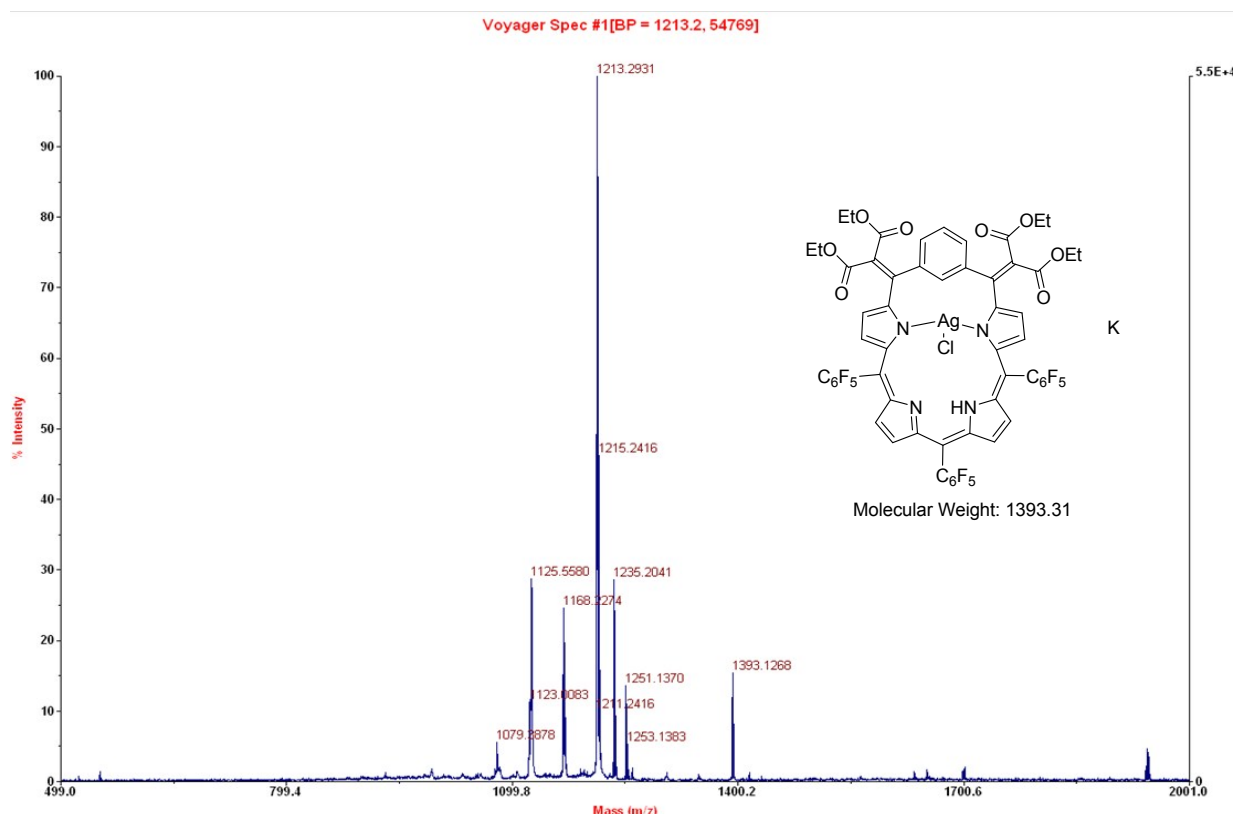

**Fig. 34S:** Comparative  $^1\text{H}$  NMR spectra of **4** (top) and Ag(III) complex **9** (bottom) in  $\text{CDCl}_3$  at 300 K.

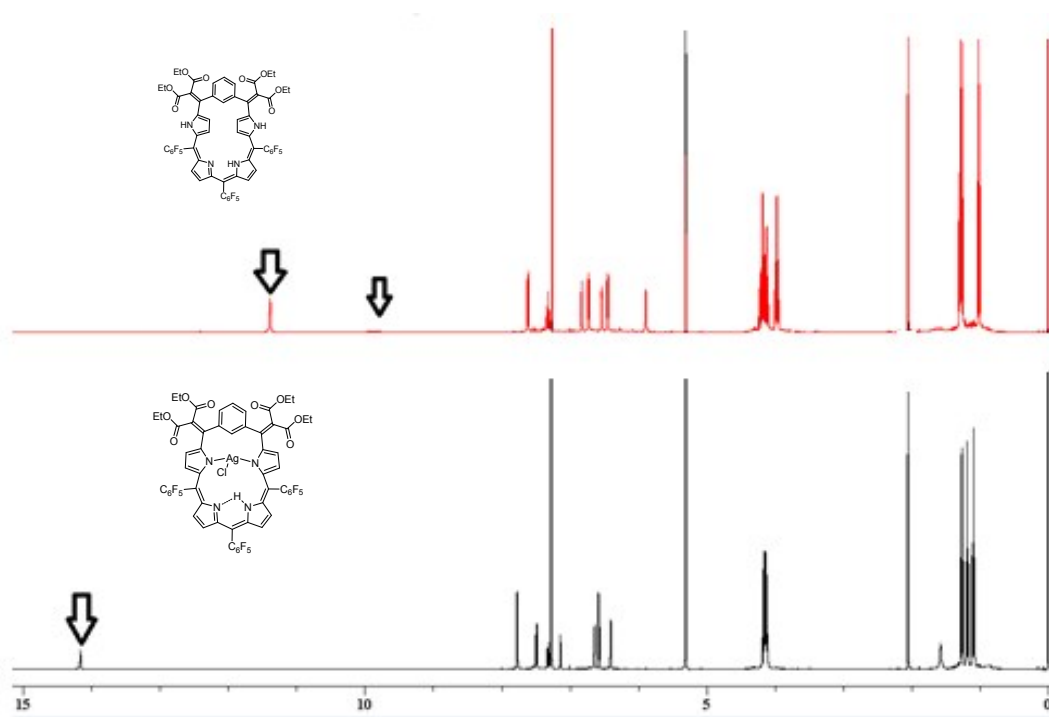

**Fig. 35S:** UV-Vis absorption spectra of *m*-benzipentaphyrin **4** (green) (33.0  $\mu\text{M}$ ), Au-complex **8** (red) (27.7  $\mu\text{M}$ ), Ag-complex **9** (black) (28.7  $\mu\text{M}$ ) in acetonitrile.

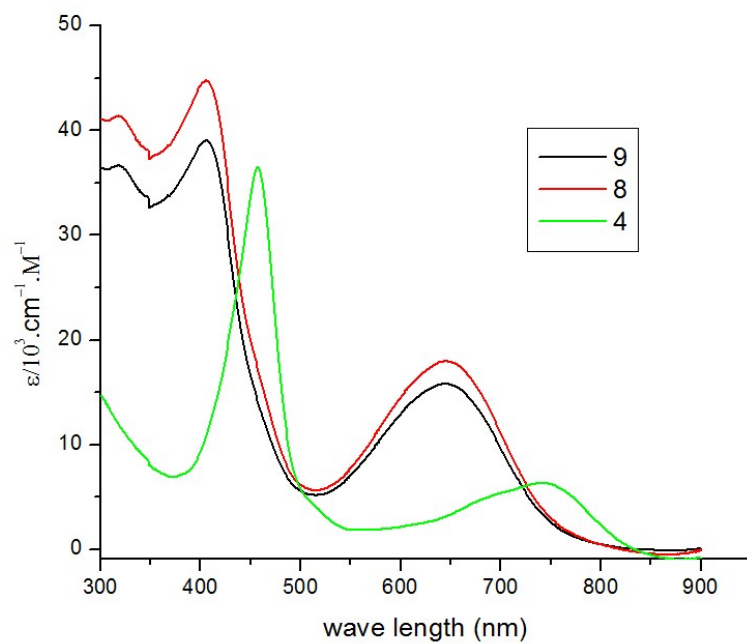

Table 1S: Crystal data and structure refinement for complex **7a**.

|                                   |                                                   |                          |
|-----------------------------------|---------------------------------------------------|--------------------------|
| Empirical formula                 | $C_{96}H_{23}F_{20}N_6O_{17.5}Pd_2$               |                          |
| Formula weight                    | 2133.00                                           |                          |
| Temperature                       | 170(2) K                                          |                          |
| Wavelength                        | 0.71073 Å                                         |                          |
| Crystal system                    | Monoclinic                                        |                          |
| Space group                       | Cc                                                |                          |
| Unit cell dimensions              | $a = 17.137(3)$ Å                                 | $\alpha = 90.00^\circ$   |
|                                   | $b = 24.199(5)$ Å                                 | $\beta = 94.81(3)^\circ$ |
|                                   | $c = 23.303(5)$ Å                                 | $\gamma = 90.00^\circ$   |
| Volume                            | $9630(3)$ Å <sup>3</sup>                          |                          |
| Z                                 | 4                                                 |                          |
| Density (calculated)              | 1.471 Mg/m <sup>3</sup>                           |                          |
| Absorption coefficient            | 0.480 mm <sup>-1</sup>                            |                          |
| F(000)                            | 4212                                              |                          |
| Crystal size                      | 0.15 x 0.03 x 0.03 mm <sup>3</sup>                |                          |
| Theta range for data collection   | 1.65 to 26.00°                                    |                          |
| Index ranges                      | -11 ≤ h ≤ 21, -29 ≤ k ≤ 29, -28 ≤ l ≤ 26          |                          |
| Reflections collected             | 26742                                             |                          |
| Independent reflections           | 12070 [R(int) = 0.0983]                           |                          |
| Completeness to theta = 26.00°    | 99.0 %                                            |                          |
| Absorption correction             | multi-scan                                        |                          |
| Refinement method                 | Full-matrix least-squares on F <sup>2</sup>       |                          |
| Data / restraints / parameters    | 12070 / 332 / 1278                                |                          |
| Goodness-of-fit on F <sup>2</sup> | 0.984                                             |                          |
| Final R indices [I > 2σ(I)]       | R <sub>1</sub> = 0.0712, wR <sub>2</sub> = 0.1728 |                          |
| R indices (all data)              | R <sub>1</sub> = 0.1210, wR <sub>2</sub> = 0.2045 |                          |
| Absolute structure parameter      | 0.15(9)                                           |                          |
| Largest diff. peak and hole       | 1.196 and -0.690 e·Å <sup>-3</sup>                |                          |

Table 2. Atomic coordinates (Å x 10<sup>4</sup>) and equivalent isotropic displacement parameters (Å<sup>2</sup> x 10<sup>3</sup>) for Pd. U(eq) is defined as one third of the trace of the orthogonalized U<sup>ij</sup> tensor.

|       | x        | y       | z       | U(eq) |
|-------|----------|---------|---------|-------|
| Pd(1) | 8376(2)  | 2457(1) | 3254(1) | 27(1) |
| Pd(2) | 1165(2)  | 2458(1) | 5098(1) | 25(1) |
| F(11) | 5876(8)  | 1231(5) | 2844(7) | 58(4) |
| F(12) | 4950(7)  | 371(6)  | 2488(7) | 80(5) |
| F(13) | 5612(7)  | -541(6) | 2019(7) | 62(4) |
| F(14) | 7204(8)  | -579(5) | 2031(6) | 62(4) |
| F(15) | 8104(8)  | 293(6)  | 2353(8) | 88(6) |
| F(16) | 9875(7)  | 1140(5) | 4932(6) | 56(4) |
| F(17) | 10000(9) | 625(7)  | 5948(6) | 81(5) |
| F(18) | 9076(8)  | 887(6)  | 6771(6) | 65(4) |
| F(19) | 8003(8)  | 1731(7) | 6607(6) | 67(5) |
| F(21) | -301(8)  | 1150(6) | 3426(6) | 66(4) |
| F(22) | -458(8)  | 629(6)  | 2400(7) | 82(5) |

|        |          |          |          |         |
|--------|----------|----------|----------|---------|
| F(23)  | 513(8)   | 902(6)   | 1546(6)  | 67(4)   |
| F(24)  | 1544(9)  | 1710(6)  | 1746(6)  | 67(4)   |
| F(25)  | 1729(7)  | 2232(5)  | 2768(5)  | 48(3)   |
| F(26)  | 3739(7)  | 1233(6)  | 5511(6)  | 57(4)   |
| F(27)  | 4634(8)  | 383(10)  | 5990(10) | 42(5)   |
| F(37)  | 4584(9)  | 330(14)  | 5775(13) | 69(9)   |
| F(28)  | 3901(8)  | -557(6)  | 6270(7)  | 68(4)   |
| F(29)  | 2368(8)  | -582(6)  | 6399(7)  | 72(4)   |
| F(110) | 7840(8)  | 2243(7)  | 5584(6)  | 61(4)   |
| F(210) | 1474(8)  | 257(6)   | 5951(7)  | 67(4)   |
| N(11)  | 8117(9)  | 2117(6)  | 2478(7)  | 23(4)   |
| N(12)  | 8139(10) | 1729(6)  | 3651(7)  | 30(4)   |
| N(13)  | 8598(10) | 2765(7)  | 4030(8)  | 37(4)   |
| N(21)  | 947(8)   | 2808(6)  | 4309(6)  | 20(3)   |
| N(22)  | 1401(10) | 1716(7)  | 4693(8)  | 32(4)   |
| N(23)  | 1395(10) | 2095(7)  | 5872(8)  | 31(4)   |
| O(11)  | 7572(11) | 4490(7)  | 4832(6)  | 75(6)   |
| O(12)  | 7123(8)  | 3632(8)  | 4655(6)  | 52(4)   |
| O(13)  | 7460(30) | 4945(10) | 3620(30) | 140(20) |
| O(33)  | 7290(20) | 4981(6)  | 3602(12) | 39(7)   |
| O(14)  | 6861(10) | 4260(7)  | 3048(6)  | 68(5)   |
| O(15)  | 10595(9) | 3097(8)  | 1999(7)  | 52(4)   |
| O(16)  | 10387(7) | 3138(6)  | 1055(7)  | 46(4)   |
| O(17)  | 9721(10) | 1851(6)  | 1066(7)  | 53(4)   |
| O(18)  | 8951(8)  | 2480(4)  | 615(6)   | 28(3)   |
| O(21)  | -137(11) | 1804(7)  | 7290(8)  | 62(5)   |
| O(22)  | 657(12)  | 2449(6)  | 7763(6)  | 59(5)   |
| O(23)  | -1045(9) | 3043(8)  | 6327(8)  | 64(5)   |
| O(24)  | -830(8)  | 3144(6)  | 7309(6)  | 48(4)   |
| O(25)  | 2008(9)  | 4492(7)  | 3539(7)  | 57(4)   |
| O(26)  | 2480(9)  | 3658(7)  | 3697(5)  | 49(4)   |
| O(27)  | 2607(11) | 4896(7)  | 4716(8)  | 48(5)   |
| O(37)  | 2085(12) | 5013(5)  | 4800(8)  | 24(5)   |
| O(28)  | 2721(9)  | 4231(7)  | 5209(8)  | 73(5)   |
| C(11)  | 8298(10) | 2307(7)  | 1971(8)  | 18(4)   |
| C(12)  | 7873(14) | 1964(9)  | 1533(10) | 46(6)   |
| C(13)  | 7489(9)  | 1555(7)  | 1797(8)  | 17(4)   |
| C(14)  | 7613(11) | 1614(8)  | 2391(9)  | 28(5)   |
| C(15)  | 7458(12) | 1291(9)  | 2789(10) | 39(5)   |
| C(16)  | 7747(10) | 1293(7)  | 3389(8)  | 22(4)   |
| C(17)  | 7613(14) | 861(8)   | 3807(10) | 43(6)   |
| C(18)  | 8046(11) | 1040(7)  | 4348(8)  | 32(5)   |
| C(19)  | 8320(12) | 1571(8)  | 4223(9)  | 27(5)   |
| C(110) | 8679(12) | 1952(9)  | 4625(10) | 33(5)   |
| C(111) | 8850(15) | 2517(8)  | 4562(11) | 33(6)   |
| C(112) | 9039(12) | 2941(10) | 4989(9)  | 43(6)   |
| C(113) | 8888(12) | 3421(9)  | 4749(10) | 33(5)   |
| C(114) | 8592(11) | 3318(8)  | 4191(9)  | 27(5)   |
| C(115) | 8233(12) | 3741(8)  | 3729(9)  | 34(5)   |
| C(116) | 8527(11) | 3692(8)  | 3169(9)  | 26(4)   |
| C(117) | 8706(13) | 4177(8)  | 2884(10) | 44(6)   |
| C(118) | 8896(12) | 4201(9)  | 2401(10) | 40(5)   |



|        |           |          |          |         |
|--------|-----------|----------|----------|---------|
| C(119) | 8992(14)  | 3737(10) | 2070(10) | 51(6)   |
| C(120) | 8857(10)  | 3188(7)  | 2332(8)  | 14(3)   |
| C(121) | 8580(10)  | 3190(7)  | 2880(8)  | 20(4)   |
| C(122) | 8899(10)  | 2669(7)  | 1938(8)  | 31(4)   |
| C(123) | 6995(12)  | 762(9)   | 2628(9)  | 36(5)   |
| C(124) | 7310(11)  | 320(7)   | 2417(7)  | 26(4)   |
| C(125) | 6856(13)  | -168(8)  | 2214(9)  | 43(6)   |
| C(126) | 6103(10)  | -131(6)  | 2280(7)  | 28(4)   |
| C(127) | 5771(11)  | 309(10)  | 2495(10) | 46(5)   |
| C(128) | 6215(13)  | 777(10)  | 2625(10) | 40(6)   |
| C(129) | 8856(11)  | 1711(9)  | 5222(8)  | 35(6)   |
| C(130) | 9393(13)  | 1297(10) | 5365(10) | 52(7)   |
| C(131) | 9511(14)  | 1053(11) | 5874(10) | 50(6)   |
| C(132) | 9037(13)  | 1192(11) | 6284(9)  | 52(7)   |
| C(133) | 8461(13)  | 1621(9)  | 6170(11) | 45(6)   |
| C(134) | 8425(14)  | 1862(11) | 5670(11) | 48(6)   |
| C(135) | 7677(12)  | 4084(8)  | 3910(9)  | 32(5)   |
| C(136) | 7480(13)  | 4118(9)  | 4525(9)  | 41(5)   |
| C(137) | 7045(16)  | 3568(12) | 5279(6)  | 36(7)   |
| C(337) | 6738(13)  | 3701(10) | 5195(8)  | 28(6)   |
| C(138) | 6420(20)  | 3148(14) | 5283(18) | 44(10)  |
| C(438) | 6150(20)  | 3253(14) | 5180(20) | 77(13)  |
| C(139) | 7174(10)  | 4474(5)  | 3534(8)  | 49(5)   |
| C(140) | 6536(11)  | 4713(7)  | 2672(10) | 27(6)   |
| C(340) | 6643(16)  | 4610(20) | 2540(19) | 140(30) |
| C(141) | 5817(12)  | 4441(10) | 2414(12) | 107(9)  |
| C(142) | 9476(13)  | 2693(10) | 1553(10) | 38(5)   |
| C(143) | 10188(12) | 3021(10) | 1592(10) | 47(6)   |
| C(144) | 11154(15) | 3419(19) | 1055(17) | 36(12)  |
| C(145) | 11350(20) | 3676(15) | 509(15)  | 48(9)   |
| C(344) | 11130(30) | 3430(40) | 972(18)  | 110(30) |
| C(345) | 11140(20) | 3551(17) | 350(17)  | 44(9)   |
| C(146) | 9339(14)  | 2284(10) | 1047(9)  | 45(6)   |
| C(147) | 8861(9)   | 2086(6)  | 127(5)   | 44(4)   |
| C(148) | 8330(20)  | 2357(15) | -324(13) | 46(9)   |
| C(448) | 8110(19)  | 2230(20) | -200(20) | 120(20) |
| C(21)  | 998(12)   | 3320(8)  | 4212(9)  | 34(5)   |
| C(22)  | 680(12)   | 3415(10) | 3582(10) | 40(6)   |
| C(23)  | 501(12)   | 2898(7)  | 3349(10) | 33(5)   |
| C(24)  | 740(14)   | 2494(7)  | 3802(11) | 27(5)   |
| C(25)  | 864(12)   | 1970(9)  | 3714(9)  | 34(5)   |
| C(26)  | 1245(13)  | 1615(8)  | 4143(9)  | 35(5)   |
| C(27)  | 1578(12)  | 1077(9)  | 4039(10) | 42(5)   |
| C(28)  | 1884(13)  | 890(9)   | 4512(10) | 41(6)   |
| C(29)  | 1827(14)  | 1284(10) | 4941(12) | 52(6)   |
| C(210) | 2049(10)  | 1250(8)  | 5529(8)  | 23(4)   |
| C(211) | 1852(10)  | 1655(6)  | 5980(8)  | 20(4)   |
| C(212) | 2023(14)  | 1589(8)  | 6592(10) | 49(6)   |
| C(213) | 1643(9)   | 1966(7)  | 6844(8)  | 17(4)   |
| C(214) | 1229(13)  | 2259(10) | 6392(10) | 39(5)   |
| C(215) | 666(9)    | 2752(6)  | 6435(6)  | 17(3)   |
| C(216) | 709(12)   | 3249(8)  | 6055(9)  | 35(5)   |

|        |           |          |          |         |
|--------|-----------|----------|----------|---------|
| C(217) | 519(9)    | 3717(6)  | 6287(7)  | 15(3)   |
| C(218) | 576(10)   | 4216(7)  | 6027(8)  | 29(4)   |
| C(219) | 887(11)   | 4212(8)  | 5433(8)  | 27(4)   |
| C(220) | 1079(12)  | 3677(8)  | 5228(9)  | 33(5)   |
| C(221) | 928(11)   | 3163(9)  | 5477(10) | 40(6)   |
| C(222) | 1345(12)  | 3697(7)  | 4590(8)  | 30(5)   |
| C(223) | 694(13)   | 1713(8)  | 3120(9)  | 42(6)   |
| C(224) | 138(11)   | 1302(7)  | 3029(9)  | 39(6)   |
| C(225) | 95(13)    | 1020(9)  | 2494(12) | 52(7)   |
| C(226) | 564(13)   | 1156(8)  | 2051(10) | 48(6)   |
| C(227) | 1058(15)  | 1546(11) | 2146(9)  | 51(6)   |
| C(228) | 1173(11)  | 1849(8)  | 2677(9)  | 28(5)   |
| C(229) | 2561(12)  | 790(7)   | 5732(8)  | 27(5)   |
| C(230) | 3354(13)  | 782(8)   | 5693(9)  | 33(5)   |
| C(231) | 3856(8)   | 368(8)   | 5928(9)  | 44(5)   |
| C(232) | 3535(12)  | -93(8)   | 6151(9)  | 50(6)   |
| C(233) | 2694(13)  | -113(8)  | 6147(10) | 45(6)   |
| C(234) | 2228(15)  | 293(9)   | 5968(12) | 64(8)   |
| C(235) | 147(11)   | 2661(8)  | 6826(8)  | 25(4)   |
| C(236) | 141(12)   | 2254(10) | 7308(9)  | 35(5)   |
| C(237) | 775(11)   | 2190(6)  | 8268(5)  | 59(5)   |
| C(238) | 1332(19)  | 2505(12) | 8663(12) | 39(8)   |
| C(338) | 1032(19)  | 2564(10) | 8749(10) | 41(7)   |
| C(239) | -641(13)  | 2986(7)  | 6781(9)  | 34(5)   |
| C(240) | -1616(10) | 3381(10) | 7307(8)  | 50(7)   |
| C(241) | -1588(14) | 3657(12) | 7903(11) | 101(11) |
| C(242) | 1847(14)  | 4073(8)  | 4456(9)  | 47(6)   |
| C(243) | 2118(14)  | 4083(11) | 3851(11) | 51(6)   |
| C(244) | 2705(11)  | 3556(7)  | 3103(8)  | 56(6)   |
| C(245) | 3220(30)  | 3073(13) | 3050(20) | 38(12)  |
| C(445) | 3100(30)  | 3011(12) | 3110(20) | 70(20)  |
| C(246) | 2187(9)   | 4503(5)  | 4853(7)  | 47(5)   |
| C(247) | 3256(12)  | 4535(10) | 5630(8)  | 106(7)  |
| C(248) | 3960(20)  | 4430(20) | 6031(19) | 86(14)  |
| C(348) | 2780(17)  | 4805(13) | 6051(12) | 65(8)   |
| O(1W)  | 9537(13)  | 4784(9)  | 4273(11) | 85(7)   |
| O(2W)  | 268(17)   | 5586(12) | 4063(14) | 117(9)  |
| O(3W)  | 10430(20) | 9374(15) | 4285(16) | 148(12) |

---

Table 3. Bond lengths [ $\text{\AA}$ ] and angles [ $^\circ$ ] for Pd.

---

|               |           |
|---------------|-----------|
| Pd(1)-N(13)   | 1.962(17) |
| Pd(1)-N(11)   | 2.004(15) |
| Pd(1)-C(121)  | 2.020(17) |
| Pd(1)-N(12)   | 2.045(15) |
| Pd(2)-C(221)  | 1.98(2)   |
| Pd(2)-N(23)   | 2.015(17) |
| Pd(2)-N(21)   | 2.030(14) |
| Pd(2)-N(22)   | 2.084(17) |
| F(11)-C(128)  | 1.36(3)   |
| F(12)-C(127)  | 1.414(17) |
| F(13)-C(126)  | 1.405(18) |
| F(14)-C(125)  | 1.25(2)   |
| F(15)-C(124)  | 1.38(2)   |
| F(16)-C(130)  | 1.41(2)   |
| F(17)-C(131)  | 1.33(3)   |
| F(18)-C(132)  | 1.35(2)   |
| F(19)-C(133)  | 1.36(3)   |
| F(21)-C(224)  | 1.29(3)   |
| F(22)-C(225)  | 1.34(2)   |
| F(23)-C(226)  | 1.33(2)   |
| F(24)-C(227)  | 1.36(3)   |
| F(25)-C(228)  | 1.33(2)   |
| F(26)-C(230)  | 1.36(2)   |
| F(27)-C(231)  | 1.330(2)  |
| F(37)-C(231)  | 1.330(2)  |
| F(28)-C(232)  | 1.30(2)   |
| F(29)-C(233)  | 1.42(2)   |
| F(110)-C(134) | 1.36(3)   |
| F(210)-C(234) | 1.29(3)   |
| N(11)-C(11)   | 1.33(2)   |
| N(11)-C(14)   | 1.50(2)   |
| N(12)-C(16)   | 1.37(2)   |
| N(12)-C(19)   | 1.40(2)   |
| N(13)-C(114)  | 1.39(2)   |
| N(13)-C(111)  | 1.41(3)   |
| N(21)-C(21)   | 1.26(2)   |
| N(21)-C(24)   | 1.42(3)   |
| N(22)-C(26)   | 1.31(3)   |
| N(22)-C(29)   | 1.37(3)   |
| N(23)-C(214)  | 1.33(3)   |
| N(23)-C(211)  | 1.33(2)   |
| O(11)-C(136)  | 1.15(2)   |
| O(12)-C(136)  | 1.37(3)   |
| O(12)-C(337)  | 1.480(2)  |
| O(12)-C(137)  | 1.481(2)  |
| O(13)-C(139)  | 1.251(2)  |
| O(33)-C(139)  | 1.250(2)  |
| O(14)-C(139)  | 1.32(2)   |
| O(14)-C(340)  | 1.481(2)  |
| O(14)-C(140)  | 1.481(2)  |

|               |           |
|---------------|-----------|
| O(15)-C(143)  | 1.14(2)   |
| O(16)-C(143)  | 1.35(3)   |
| O(16)-C(344)  | 1.480(2)  |
| O(16)-C(144)  | 1.480(2)  |
| O(17)-C(146)  | 1.23(3)   |
| O(18)-C(146)  | 1.25(3)   |
| O(18)-C(147)  | 1.483(2)  |
| O(21)-C(236)  | 1.19(3)   |
| O(22)-C(237)  | 1.333(2)  |
| O(22)-C(236)  | 1.41(3)   |
| O(23)-C(239)  | 1.22(2)   |
| O(24)-C(239)  | 1.35(2)   |
| O(24)-C(240)  | 1.463(15) |
| O(25)-C(243)  | 1.23(3)   |
| O(26)-C(243)  | 1.27(3)   |
| O(26)-C(244)  | 1.488(17) |
| O(27)-C(246)  | 1.249(2)  |
| O(37)-C(246)  | 1.250(2)  |
| O(28)-C(246)  | 1.35(2)   |
| O(28)-C(247)  | 1.481(2)  |
| C(11)-C(122)  | 1.36(3)   |
| C(11)-C(12)   | 1.46(3)   |
| C(12)-C(13)   | 1.36(3)   |
| C(12)-H(12)   | 0.9500    |
| C(13)-C(14)   | 1.39(3)   |
| C(13)-H(13)   | 0.9500    |
| C(14)-C(15)   | 1.26(3)   |
| C(15)-C(16)   | 1.44(3)   |
| C(15)-C(123)  | 1.54(3)   |
| C(16)-C(17)   | 1.46(3)   |
| C(17)-C(18)   | 1.47(3)   |
| C(17)-H(17)   | 0.9500    |
| C(18)-C(19)   | 1.41(3)   |
| C(18)-H(18)   | 0.9500    |
| C(19)-C(110)  | 1.42(3)   |
| C(110)-C(111) | 1.41(3)   |
| C(110)-C(129) | 1.52(3)   |
| C(111)-C(112) | 1.45(3)   |
| C(112)-C(113) | 1.31(3)   |
| C(112)-H(112) | 0.9500    |
| C(113)-C(114) | 1.38(3)   |
| C(113)-H(113) | 0.9500    |
| C(114)-C(115) | 1.57(3)   |
| C(115)-C(135) | 1.36(3)   |
| C(115)-C(116) | 1.44(3)   |
| C(116)-C(117) | 1.39(3)   |
| C(116)-C(121) | 1.40(3)   |
| C(117)-C(118) | 1.20(3)   |
| C(117)-H(117) | 0.9500    |
| C(118)-C(119) | 1.38(3)   |
| C(118)-H(118) | 0.9500    |
| C(119)-C(120) | 1.49(3)   |

|               |           |
|---------------|-----------|
| C(119)-H(119) | 0.9500    |
| C(120)-C(121) | 1.40(2)   |
| C(120)-C(122) | 1.56(2)   |
| C(122)-C(142) | 1.39(3)   |
| C(123)-C(124) | 1.31(3)   |
| C(123)-C(128) | 1.34(3)   |
| C(124)-C(125) | 1.47(3)   |
| C(125)-C(126) | 1.32(2)   |
| C(126)-C(127) | 1.32(3)   |
| C(127)-C(128) | 1.38(3)   |
| C(129)-C(130) | 1.38(3)   |
| C(129)-C(134) | 1.38(3)   |
| C(130)-C(131) | 1.33(3)   |
| C(131)-C(132) | 1.35(3)   |
| C(132)-C(133) | 1.44(3)   |
| C(133)-C(134) | 1.30(3)   |
| C(135)-C(136) | 1.50(3)   |
| C(135)-C(139) | 1.510(17) |
| C(137)-C(337) | 0.63(3)   |
| C(137)-C(138) | 1.480(2)  |
| C(137)-C(438) | 1.71(4)   |
| C(337)-C(138) | 1.47(4)   |
| C(337)-C(438) | 1.481(2)  |
| C(138)-C(438) | 0.56(6)   |
| C(140)-C(141) | 1.479(2)  |
| C(340)-C(141) | 1.480(2)  |
| C(142)-C(143) | 1.45(3)   |
| C(142)-C(146) | 1.54(3)   |
| C(144)-C(145) | 1.480(2)  |
| C(344)-C(345) | 1.480(2)  |
| C(147)-C(448) | 1.480(2)  |
| C(147)-C(148) | 1.480(2)  |
| C(148)-C(448) | 0.59(7)   |
| C(21)-C(222)  | 1.37(3)   |
| C(21)-C(22)   | 1.54(3)   |
| C(22)-C(23)   | 1.39(3)   |
| C(22)-H(22)   | 0.9500    |
| C(23)-C(24)   | 1.47(3)   |
| C(23)-H(23)   | 0.9500    |
| C(24)-C(25)   | 1.30(3)   |
| C(25)-C(26)   | 1.43(3)   |
| C(25)-C(223)  | 1.52(3)   |
| C(26)-C(27)   | 1.45(3)   |
| C(27)-C(28)   | 1.26(3)   |
| C(27)-H(27)   | 0.9500    |
| C(28)-C(29)   | 1.39(3)   |
| C(28)-H(28)   | 0.9500    |
| C(29)-C(210)  | 1.39(3)   |
| C(210)-C(229) | 1.47(2)   |
| C(210)-C(211) | 1.49(2)   |
| C(211)-C(212) | 1.44(3)   |
| C(212)-C(213) | 1.29(3)   |

|                    |          |
|--------------------|----------|
| C(212)-H(212)      | 0.9500   |
| C(213)-C(214)      | 1.41(3)  |
| C(213)-H(213)      | 0.9500   |
| C(214)-C(215)      | 1.54(3)  |
| C(215)-C(235)      | 1.35(2)  |
| C(215)-C(216)      | 1.50(2)  |
| C(216)-C(217)      | 1.31(3)  |
| C(216)-C(221)      | 1.44(3)  |
| C(217)-C(218)      | 1.36(2)  |
| C(217)-H(217)      | 0.9500   |
| C(218)-C(219)      | 1.53(2)  |
| C(218)-H(218)      | 0.9500   |
| C(219)-C(220)      | 1.43(3)  |
| C(219)-H(219)      | 0.9500   |
| C(220)-C(221)      | 1.41(3)  |
| C(220)-C(222)      | 1.59(3)  |
| C(222)-C(242)      | 1.31(3)  |
| C(223)-C(224)      | 1.38(3)  |
| C(223)-C(228)      | 1.41(3)  |
| C(224)-C(225)      | 1.42(3)  |
| C(225)-C(226)      | 1.40(3)  |
| C(226)-C(227)      | 1.27(3)  |
| C(227)-C(228)      | 1.44(3)  |
| C(229)-C(230)      | 1.37(3)  |
| C(229)-C(234)      | 1.46(3)  |
| C(230)-C(231)      | 1.40(3)  |
| C(231)-C(232)      | 1.37(3)  |
| C(232)-C(233)      | 1.44(3)  |
| C(233)-C(234)      | 1.31(3)  |
| C(235)-C(236)      | 1.49(3)  |
| C(235)-C(239)      | 1.56(3)  |
| C(237)-C(238)      | 1.480(2) |
| C(237)-C(338)      | 1.481(2) |
| C(240)-C(241)      | 1.54(3)  |
| C(240)-H(24A)      | 0.9900   |
| C(240)-H(24B)      | 0.9900   |
| C(241)-H(24C)      | 0.9800   |
| C(241)-H(24D)      | 0.9800   |
| C(241)-H(24E)      | 0.9800   |
| C(242)-C(246)      | 1.480(2) |
| C(242)-C(243)      | 1.52(3)  |
| C(244)-C(245)      | 1.480(2) |
| C(244)-C(445)      | 1.480(2) |
| C(247)-C(248)      | 1.480(2) |
| C(247)-C(348)      | 1.480(2) |
|                    |          |
| N(13)-Pd(1)-N(11)  | 177.3(7) |
| N(13)-Pd(1)-C(121) | 92.2(7)  |
| N(11)-Pd(1)-C(121) | 90.3(6)  |
| N(13)-Pd(1)-N(12)  | 86.6(7)  |
| N(11)-Pd(1)-N(12)  | 90.9(6)  |
| C(121)-Pd(1)-N(12) | 177.9(8) |

|                     |           |
|---------------------|-----------|
| C(221)-Pd(2)-N(23)  | 90.5(8)   |
| C(221)-Pd(2)-N(21)  | 90.9(7)   |
| N(23)-Pd(2)-N(21)   | 178.6(7)  |
| C(221)-Pd(2)-N(22)  | 179.4(8)  |
| N(23)-Pd(2)-N(22)   | 90.0(7)   |
| N(21)-Pd(2)-N(22)   | 88.7(6)   |
| C(11)-N(11)-C(14)   | 109.6(15) |
| C(11)-N(11)-Pd(1)   | 127.6(12) |
| C(14)-N(11)-Pd(1)   | 122.6(12) |
| C(16)-N(12)-C(19)   | 106.0(15) |
| C(16)-N(12)-Pd(1)   | 124.9(13) |
| C(19)-N(12)-Pd(1)   | 129.1(13) |
| C(114)-N(13)-C(111) | 100.4(16) |
| C(114)-N(13)-Pd(1)  | 127.4(14) |
| C(111)-N(13)-Pd(1)  | 132.0(14) |
| C(21)-N(21)-C(24)   | 113.0(16) |
| C(21)-N(21)-Pd(2)   | 124.2(13) |
| C(24)-N(21)-Pd(2)   | 122.8(12) |
| C(26)-N(22)-C(29)   | 109.0(19) |
| C(26)-N(22)-Pd(2)   | 124.9(13) |
| C(29)-N(22)-Pd(2)   | 125.6(15) |
| C(214)-N(23)-C(211) | 103.6(17) |
| C(214)-N(23)-Pd(2)  | 130.2(15) |
| C(211)-N(23)-Pd(2)  | 125.7(14) |
| C(136)-O(12)-C(337) | 109.3(16) |
| C(136)-O(12)-C(137) | 112.7(17) |
| C(337)-O(12)-C(137) | 24.7(13)  |
| C(139)-O(14)-C(340) | 121(3)    |
| C(139)-O(14)-C(140) | 108.8(15) |
| C(340)-O(14)-C(140) | 17(3)     |
| C(143)-O(16)-C(344) | 120(2)    |
| C(143)-O(16)-C(144) | 113.0(19) |
| C(344)-O(16)-C(144) | 8(2)      |
| C(146)-O(18)-C(147) | 112.8(14) |
| C(237)-O(22)-C(236) | 123.2(16) |
| C(239)-O(24)-C(240) | 113.4(15) |
| C(243)-O(26)-C(244) | 124.7(17) |
| C(246)-O(28)-C(247) | 120.9(16) |
| N(11)-C(11)-C(122)  | 120.5(15) |
| N(11)-C(11)-C(12)   | 106.5(17) |
| C(122)-C(11)-C(12)  | 131.5(19) |
| C(13)-C(12)-C(11)   | 109.2(19) |
| C(13)-C(12)-H(12)   | 125.4     |
| C(11)-C(12)-H(12)   | 125.4     |
| C(12)-C(13)-C(14)   | 109.6(17) |
| C(12)-C(13)-H(13)   | 125.2     |
| C(14)-C(13)-H(13)   | 125.2     |
| C(15)-C(14)-C(13)   | 130.2(19) |
| C(15)-C(14)-N(11)   | 124.0(19) |
| C(13)-C(14)-N(11)   | 104.9(16) |
| C(14)-C(15)-C(16)   | 129(2)    |
| C(14)-C(15)-C(123)  | 118(2)    |

|                      |           |
|----------------------|-----------|
| C(16)-C(15)-C(123)   | 111.5(18) |
| N(12)-C(16)-C(15)    | 123.4(17) |
| N(12)-C(16)-C(17)    | 110.8(15) |
| C(15)-C(16)-C(17)    | 125.6(17) |
| C(16)-C(17)-C(18)    | 105.3(15) |
| C(16)-C(17)-H(17)    | 127.4     |
| C(18)-C(17)-H(17)    | 127.4     |
| C(19)-C(18)-C(17)    | 104.2(16) |
| C(19)-C(18)-H(18)    | 127.9     |
| C(17)-C(18)-H(18)    | 127.9     |
| N(12)-C(19)-C(18)    | 113.4(17) |
| N(12)-C(19)-C(110)   | 120.1(18) |
| C(18)-C(19)-C(110)   | 126.3(19) |
| C(111)-C(110)-C(19)  | 130(2)    |
| C(111)-C(110)-C(129) | 116.2(19) |
| C(19)-C(110)-C(129)  | 113.5(18) |
| C(110)-C(111)-N(13)  | 116.9(19) |
| C(110)-C(111)-C(112) | 131(2)    |
| N(13)-C(111)-C(112)  | 109.7(17) |
| C(113)-C(112)-C(111) | 108(2)    |
| C(113)-C(112)-H(112) | 125.9     |
| C(111)-C(112)-H(112) | 125.9     |
| C(112)-C(113)-C(114) | 107(2)    |
| C(112)-C(113)-H(113) | 126.7     |
| C(114)-C(113)-H(113) | 126.7     |
| C(113)-C(114)-N(13)  | 114.7(18) |
| C(113)-C(114)-C(115) | 128.3(18) |
| N(13)-C(114)-C(115)  | 116.9(17) |
| C(135)-C(115)-C(116) | 129.7(19) |
| C(135)-C(115)-C(114) | 115.4(18) |
| C(116)-C(115)-C(114) | 114.8(17) |
| C(117)-C(116)-C(121) | 118.5(19) |
| C(117)-C(116)-C(115) | 118.0(19) |
| C(121)-C(116)-C(115) | 123.3(18) |
| C(118)-C(117)-C(116) | 125(2)    |
| C(118)-C(117)-H(117) | 117.4     |
| C(116)-C(117)-H(117) | 117.4     |
| C(117)-C(118)-C(119) | 123(2)    |
| C(117)-C(118)-H(118) | 118.7     |
| C(119)-C(118)-H(118) | 118.7     |
| C(118)-C(119)-C(120) | 118(2)    |
| C(118)-C(119)-H(119) | 121.1     |
| C(120)-C(119)-H(119) | 121.1     |
| C(121)-C(120)-C(119) | 116.6(17) |
| C(121)-C(120)-C(122) | 125.1(16) |
| C(119)-C(120)-C(122) | 117.5(16) |
| C(116)-C(121)-C(120) | 119.0(17) |
| C(116)-C(121)-Pd(1)  | 122.4(14) |
| C(120)-C(121)-Pd(1)  | 118.4(13) |
| C(11)-C(122)-C(142)  | 130.3(18) |
| C(11)-C(122)-C(120)  | 114.4(16) |
| C(142)-C(122)-C(120) | 114.5(16) |



|                      |           |
|----------------------|-----------|
| C(124)-C(123)-C(128) | 118(2)    |
| C(124)-C(123)-C(15)  | 123.4(19) |
| C(128)-C(123)-C(15)  | 118(2)    |
| C(123)-C(124)-F(15)  | 121.2(17) |
| C(123)-C(124)-C(125) | 123.5(18) |
| F(15)-C(124)-C(125)  | 115.3(16) |
| F(14)-C(125)-C(126)  | 126.4(17) |
| F(14)-C(125)-C(124)  | 119.6(19) |
| C(126)-C(125)-C(124) | 113.9(18) |
| C(125)-C(126)-C(127) | 123.8(16) |
| C(125)-C(126)-F(13)  | 117.3(15) |
| C(127)-C(126)-F(13)  | 118.1(16) |
| C(126)-C(127)-C(128) | 119.7(18) |
| C(126)-C(127)-F(12)  | 122.7(19) |
| C(128)-C(127)-F(12)  | 116.3(19) |
| C(123)-C(128)-F(11)  | 119(2)    |
| C(123)-C(128)-C(127) | 121(2)    |
| F(11)-C(128)-C(127)  | 119.9(19) |
| C(130)-C(129)-C(134) | 113.4(19) |
| C(130)-C(129)-C(110) | 125(2)    |
| C(134)-C(129)-C(110) | 121(2)    |
| C(131)-C(130)-C(129) | 126(2)    |
| C(131)-C(130)-F(16)  | 118(2)    |
| C(129)-C(130)-F(16)  | 116(2)    |
| C(130)-C(131)-F(17)  | 120(2)    |
| C(130)-C(131)-C(132) | 118(2)    |
| F(17)-C(131)-C(132)  | 121(2)    |
| C(131)-C(132)-F(18)  | 118(2)    |
| C(131)-C(132)-C(133) | 120(2)    |
| F(18)-C(132)-C(133)  | 122(2)    |
| C(134)-C(133)-F(19)  | 126(2)    |
| C(134)-C(133)-C(132) | 118(3)    |
| F(19)-C(133)-C(132)  | 116(2)    |
| C(133)-C(134)-F(110) | 115(2)    |
| C(133)-C(134)-C(129) | 125(2)    |
| F(110)-C(134)-C(129) | 120(2)    |
| C(115)-C(135)-C(136) | 123.5(15) |
| C(115)-C(135)-C(139) | 125.7(19) |
| C(136)-C(135)-C(139) | 110.8(17) |
| O(11)-C(136)-O(12)   | 125(2)    |
| O(11)-C(136)-C(135)  | 127(2)    |
| O(12)-C(136)-C(135)  | 107.6(15) |
| C(337)-C(137)-O(12)  | 77.6(7)   |
| C(337)-C(137)-C(138) | 76(4)     |
| O(12)-C(137)-C(138)  | 102(2)    |
| C(337)-C(137)-C(438) | 58(3)     |
| O(12)-C(137)-C(438)  | 94(2)     |
| C(138)-C(137)-C(438) | 19(2)     |
| C(137)-C(337)-C(138) | 79(3)     |
| C(137)-C(337)-O(12)  | 77.7(7)   |
| C(138)-C(337)-O(12)  | 102(2)    |
| C(137)-C(337)-C(438) | 101(4)    |

|                      |           |
|----------------------|-----------|
| C(138)-C(337)-C(438) | 22(2)     |
| O(12)-C(337)-C(438)  | 104(2)    |
| C(438)-C(138)-C(337) | 80(4)     |
| C(438)-C(138)-C(137) | 105(5)    |
| C(337)-C(138)-C(137) | 24.8(14)  |
| C(138)-C(438)-C(337) | 78(4)     |
| C(138)-C(438)-C(137) | 57(3)     |
| C(337)-C(438)-C(137) | 21.3(13)  |
| O(33)-C(139)-O(13)   | 14(3)     |
| O(33)-C(139)-O(14)   | 122.9(19) |
| O(13)-C(139)-O(14)   | 129(3)    |
| O(33)-C(139)-C(135)  | 118(2)    |
| O(13)-C(139)-C(135)  | 106(3)    |
| O(14)-C(139)-C(135)  | 115.1(14) |
| C(141)-C(140)-O(14)  | 99.8(14)  |
| C(141)-C(340)-O(14)  | 99.8(14)  |
| C(140)-C(141)-C(340) | 17(3)     |
| C(122)-C(142)-C(143) | 129(2)    |
| C(122)-C(142)-C(146) | 113.3(18) |
| C(143)-C(142)-C(146) | 118(2)    |
| O(15)-C(143)-O(16)   | 123(2)    |
| O(15)-C(143)-C(142)  | 126(2)    |
| O(16)-C(143)-C(142)  | 109.5(18) |
| C(145)-C(144)-O(16)  | 117(3)    |
| O(16)-C(344)-C(345)  | 108(3)    |
| O(17)-C(146)-O(18)   | 127(2)    |
| O(17)-C(146)-C(142)  | 118(2)    |
| O(18)-C(146)-C(142)  | 114(2)    |
| C(448)-C(147)-C(148) | 23(3)     |
| C(448)-C(147)-O(18)  | 106(3)    |
| C(148)-C(147)-O(18)  | 106.2(18) |
| C(448)-C(148)-C(147) | 78.5(14)  |
| C(148)-C(448)-C(147) | 78.5(14)  |
| N(21)-C(21)-C(222)   | 124.7(18) |
| N(21)-C(21)-C(22)    | 107.0(18) |
| C(222)-C(21)-C(22)   | 128.0(18) |
| C(23)-C(22)-C(21)    | 106.8(19) |
| C(23)-C(22)-H(22)    | 126.6     |
| C(21)-C(22)-H(22)    | 126.6     |
| C(22)-C(23)-C(24)    | 106.2(19) |
| C(22)-C(23)-H(23)    | 126.9     |
| C(24)-C(23)-H(23)    | 126.9     |
| C(25)-C(24)-N(21)    | 128(2)    |
| C(25)-C(24)-C(23)    | 125(2)    |
| N(21)-C(24)-C(23)    | 106.0(15) |
| C(24)-C(25)-C(26)    | 123(2)    |
| C(24)-C(25)-C(223)   | 121.3(19) |
| C(26)-C(25)-C(223)   | 115.5(18) |
| N(22)-C(26)-C(25)    | 127.9(19) |
| N(22)-C(26)-C(27)    | 106.3(17) |
| C(25)-C(26)-C(27)    | 125.8(19) |
| C(28)-C(27)-C(26)    | 108(2)    |

|                      |           |
|----------------------|-----------|
| C(28)-C(27)-H(27)    | 125.8     |
| C(26)-C(27)-H(27)    | 125.8     |
| C(27)-C(28)-C(29)    | 109(2)    |
| C(27)-C(28)-H(28)    | 125.3     |
| C(29)-C(28)-H(28)    | 125.3     |
| N(22)-C(29)-C(28)    | 107(2)    |
| N(22)-C(29)-C(210)   | 123(2)    |
| C(28)-C(29)-C(210)   | 130(2)    |
| C(29)-C(210)-C(229)  | 117.8(18) |
| C(29)-C(210)-C(211)  | 126.4(17) |
| C(229)-C(210)-C(211) | 115.7(15) |
| N(23)-C(211)-C(212)  | 110.0(17) |
| N(23)-C(211)-C(210)  | 123.7(16) |
| C(212)-C(211)-C(210) | 125.7(16) |
| C(213)-C(212)-C(211) | 107.7(18) |
| C(213)-C(212)-H(212) | 126.2     |
| C(211)-C(212)-H(212) | 126.1     |
| C(212)-C(213)-C(214) | 104.8(18) |
| C(212)-C(213)-H(213) | 127.6     |
| C(214)-C(213)-H(213) | 127.6     |
| N(23)-C(214)-C(213)  | 114(2)    |
| N(23)-C(214)-C(215)  | 118.2(18) |
| C(213)-C(214)-C(215) | 128.1(19) |
| C(235)-C(215)-C(216) | 126.8(15) |
| C(235)-C(215)-C(214) | 111.7(15) |
| C(216)-C(215)-C(214) | 121.4(16) |
| C(217)-C(216)-C(221) | 127.2(19) |
| C(217)-C(216)-C(215) | 115.1(17) |
| C(221)-C(216)-C(215) | 117.6(17) |
| C(216)-C(217)-C(218) | 123.7(18) |
| C(216)-C(217)-H(217) | 118.2     |
| C(218)-C(217)-H(217) | 118.1     |
| C(217)-C(218)-C(219) | 116.3(16) |
| C(217)-C(218)-H(218) | 121.9     |
| C(219)-C(218)-H(218) | 121.9     |
| C(220)-C(219)-C(218) | 114.7(18) |
| C(220)-C(219)-H(219) | 122.7     |
| C(218)-C(219)-H(219) | 122.6     |
| C(221)-C(220)-C(219) | 127(2)    |
| C(221)-C(220)-C(222) | 119.3(18) |
| C(219)-C(220)-C(222) | 112.2(17) |
| C(220)-C(221)-C(216) | 109(2)    |
| C(220)-C(221)-Pd(2)  | 121.8(17) |
| C(216)-C(221)-Pd(2)  | 128.3(15) |
| C(242)-C(222)-C(21)  | 124.6(19) |
| C(242)-C(222)-C(220) | 119.4(17) |
| C(21)-C(222)-C(220)  | 116.0(18) |
| C(224)-C(223)-C(228) | 120(2)    |
| C(224)-C(223)-C(25)  | 121(2)    |
| C(228)-C(223)-C(25)  | 119.4(18) |
| F(21)-C(224)-C(223)  | 122.1(18) |
| F(21)-C(224)-C(225)  | 120.1(17) |

|                      |           |
|----------------------|-----------|
| C(223)-C(224)-C(225) | 118(2)    |
| F(22)-C(225)-C(226)  | 119(2)    |
| F(22)-C(225)-C(224)  | 118(2)    |
| C(226)-C(225)-C(224) | 123.0(18) |
| C(227)-C(226)-F(23)  | 119(2)    |
| C(227)-C(226)-C(225) | 117(2)    |
| F(23)-C(226)-C(225)  | 123.1(18) |
| C(226)-C(227)-F(24)  | 122(2)    |
| C(226)-C(227)-C(228) | 125(2)    |
| F(24)-C(227)-C(228)  | 113(2)    |
| F(25)-C(228)-C(223)  | 119.8(17) |
| F(25)-C(228)-C(227)  | 122(2)    |
| C(223)-C(228)-C(227) | 118(2)    |
| C(230)-C(229)-C(234) | 115.8(17) |
| C(230)-C(229)-C(210) | 123.9(18) |
| C(234)-C(229)-C(210) | 120.3(19) |
| F(26)-C(230)-C(229)  | 121.3(17) |
| F(26)-C(230)-C(231)  | 113.4(18) |
| C(229)-C(230)-C(231) | 124.4(18) |
| F(37)-C(231)-F(27)   | 22.4(16)  |
| F(37)-C(231)-C(232)  | 118(2)    |
| F(27)-C(231)-C(232)  | 114.3(18) |
| F(37)-C(231)-C(230)  | 120(2)    |
| F(27)-C(231)-C(230)  | 127(2)    |
| C(232)-C(231)-C(230) | 118.6(15) |
| F(28)-C(232)-C(231)  | 125.6(19) |
| F(28)-C(232)-C(233)  | 115.9(18) |
| C(231)-C(232)-C(233) | 117.3(17) |
| C(234)-C(233)-F(29)  | 119(2)    |
| C(234)-C(233)-C(232) | 124(2)    |
| F(29)-C(233)-C(232)  | 116.9(17) |
| F(210)-C(234)-C(233) | 123(2)    |
| F(210)-C(234)-C(229) | 117.8(18) |
| C(233)-C(234)-C(229) | 119(2)    |
| C(215)-C(235)-C(236) | 131.6(17) |
| C(215)-C(235)-C(239) | 119.4(15) |
| C(236)-C(235)-C(239) | 108.9(16) |
| O(21)-C(236)-O(22)   | 124(2)    |
| O(21)-C(236)-C(235)  | 127(2)    |
| O(22)-C(236)-C(235)  | 107.7(17) |
| O(22)-C(237)-C(238)  | 110.4(18) |
| O(22)-C(237)-C(338)  | 113.1(18) |
| C(238)-C(237)-C(338) | 22.8(16)  |
| O(23)-C(239)-O(24)   | 126.4(19) |
| O(23)-C(239)-C(235)  | 122.6(19) |
| O(24)-C(239)-C(235)  | 110.7(16) |
| O(24)-C(240)-C(241)  | 102.0(15) |
| O(24)-C(240)-H(24A)  | 111.4     |
| C(241)-C(240)-H(24A) | 111.4     |
| O(24)-C(240)-H(24B)  | 111.4     |
| C(241)-C(240)-H(24B) | 111.4     |
| H(24A)-C(240)-H(24B) | 109.2     |

|                      |           |
|----------------------|-----------|
| C(240)-C(241)-H(24C) | 109.5     |
| C(240)-C(241)-H(24D) | 109.5     |
| H(24C)-C(241)-H(24D) | 109.5     |
| C(240)-C(241)-H(24E) | 109.5     |
| H(24C)-C(241)-H(24E) | 109.5     |
| H(24D)-C(241)-H(24E) | 109.5     |
| C(222)-C(242)-C(246) | 125(2)    |
| C(222)-C(242)-C(243) | 119.4(15) |
| C(246)-C(242)-C(243) | 115.7(19) |
| O(25)-C(243)-O(26)   | 123(2)    |
| O(25)-C(243)-C(242)  | 121(2)    |
| O(26)-C(243)-C(242)  | 116(2)    |
| C(245)-C(244)-C(445) | 12(3)     |
| C(245)-C(244)-O(26)  | 114(2)    |
| C(445)-C(244)-O(26)  | 107(3)    |
| O(27)-C(246)-O(37)   | 45.9(13)  |
| O(27)-C(246)-O(28)   | 98.8(15)  |
| O(37)-C(246)-O(28)   | 128.5(15) |
| O(27)-C(246)-C(242)  | 125.4(18) |
| O(37)-C(246)-C(242)  | 126.0(17) |
| O(28)-C(246)-C(242)  | 104.6(13) |
| C(248)-C(247)-C(348) | 97(3)     |
| C(248)-C(247)-O(28)  | 139(3)    |
| C(348)-C(247)-O(28)  | 108(2)    |

---

Symmetry transformations used to generate equivalent atoms:

Table 4. Anisotropic displacement parameters ( $\text{\AA}^2 \times 10^3$ ) for Pd. The anisotropic displacement factor exponent takes the form:  $-2\pi^2 [h^2 a^{*2} U^{11} + \dots + 2 h k a^* b^* U^{12}]$

|        | U <sup>11</sup> | U <sup>22</sup> | U <sup>33</sup> | U <sup>23</sup> | U <sup>13</sup> | U <sup>12</sup> |
|--------|-----------------|-----------------|-----------------|-----------------|-----------------|-----------------|
| Pd(1)  | 33(1)           | 26(1)           | 21(1)           | -3(1)           | 4(1)            | -4(1)           |
| Pd(2)  | 27(1)           | 23(1)           | 24(1)           | 1(1)            | 1(1)            | 3(1)            |
| F(11)  | 53(8)           | 39(8)           | 83(11)          | -19(7)          | 7(7)            | -5(6)           |
| F(12)  | 38(6)           | 80(8)           | 121(11)         | -33(8)          | 6(5)            | -38(5)          |
| F(13)  | 52(8)           | 49(8)           | 85(10)          | -23(7)          | 4(7)            | -30(6)          |
| F(14)  | 87(10)          | 23(6)           | 73(8)           | -6(5)           | -7(7)           | -4(6)           |
| F(15)  | 44(8)           | 51(8)           | 173(16)         | -50(9)          | 26(9)           | -1(6)           |
| F(16)  | 53(8)           | 42(7)           | 75(10)          | 18(6)           | 10(7)           | -6(6)           |
| F(17)  | 80(11)          | 88(11)          | 70(10)          | 29(8)           | -28(8)          | 29(9)           |
| F(18)  | 90(9)           | 55(8)           | 50(8)           | 38(6)           | 1(6)            | -6(7)           |
| F(19)  | 51(9)           | 118(13)         | 36(9)           | 9(8)            | 20(7)           | 12(8)           |
| F(21)  | 68(9)           | 87(10)          | 47(8)           | -3(7)           | 25(7)           | -46(7)          |
| F(22)  | 70(10)          | 53(8)           | 126(13)         | -52(9)          | 25(8)           | -22(7)          |
| F(23)  | 68(9)           | 81(10)          | 49(8)           | -19(7)          | -22(7)          | 26(7)           |
| F(24)  | 91(12)          | 85(11)          | 27(8)           | -11(7)          | 17(7)           | 14(8)           |
| F(25)  | 58(8)           | 51(8)           | 38(7)           | -14(6)          | 25(6)           | -22(6)          |
| F(26)  | 41(7)           | 58(9)           | 74(10)          | 17(8)           | 9(6)            | 11(6)           |
| F(28)  | 78(10)          | 38(7)           | 87(11)          | 13(7)           | -3(8)           | 28(7)           |
| F(29)  | 58(8)           | 47(8)           | 111(12)         | 40(7)           | 6(7)            | 6(6)            |
| F(110) | 46(8)           | 85(10)          | 50(9)           | -2(8)           | -12(6)          | -7(8)           |
| F(210) | 49(9)           | 45(7)           | 104(11)         | 21(7)           | -5(7)           | 10(6)           |
| N(11)  | 30(6)           | 15(5)           | 23(6)           | 2(4)            | 5(4)            | -2(4)           |
| N(12)  | 43(7)           | 24(6)           | 24(6)           | 9(4)            | -1(4)           | -15(4)          |
| N(13)  | 37(4)           | 37(4)           | 37(4)           | 0(1)            | 3(1)            | 0(1)            |
| N(21)  | 20(3)           | 19(3)           | 20(3)           | 0(1)            | 2(1)            | 1(1)            |
| N(22)  | 32(4)           | 32(4)           | 32(4)           | 0(1)            | 3(1)            | 1(1)            |
| N(23)  | 31(4)           | 31(4)           | 31(4)           | 0(1)            | 3(1)            | 0(1)            |
| O(11)  | 148(13)         | 54(7)           | 26(6)           | -33(5)          | 21(6)           | 9(7)            |
| O(12)  | 48(9)           | 72(12)          | 40(9)           | -5(8)           | 27(7)           | -3(8)           |
| O(14)  | 84(11)          | 86(12)          | 28(7)           | 14(7)           | -25(6)          | 20(9)           |
| O(15)  | 48(10)          | 86(12)          | 23(8)           | 14(7)           | 6(7)            | -14(8)          |
| O(16)  | 23(8)           | 63(10)          | 51(10)          | 19(8)           | 7(7)            | -18(7)          |
| O(17)  | 68(11)          | 41(8)           | 50(10)          | -1(7)           | 14(8)           | 15(7)           |
| O(18)  | 29(3)           | 28(3)           | 28(3)           | 0(1)            | 3(1)            | 0(1)            |
| O(21)  | 71(12)          | 46(9)           | 69(13)          | 28(8)           | 12(9)           | -5(8)           |
| O(22)  | 96(12)          | 58(7)           | 24(6)           | 23(5)           | 8(5)            | 8(6)            |
| O(23)  | 42(10)          | 105(14)         | 44(11)          | 3(9)            | -7(8)           | 9(9)            |
| O(24)  | 70(11)          | 60(10)          | 14(7)           | 3(7)            | 8(7)            | 1(8)            |
| O(25)  | 58(5)           | 56(5)           | 56(5)           | 1(2)            | 4(2)            | 0(2)            |
| O(26)  | 64(10)          | 56(10)          | 25(8)           | 12(7)           | -1(7)           | -5(8)           |
| O(28)  | 53(10)          | 61(10)          | 103(13)         | -16(9)          | 2(8)            | -7(7)           |
| C(11)  | 20(6)           | 14(5)           | 20(6)           | -2(4)           | 1(4)            | 1(4)            |
| C(12)  | 61(11)          | 39(9)           | 35(9)           | -9(6)           | -12(7)          | 4(7)            |
| C(13)  | 17(4)           | 17(4)           | 17(4)           | 0(1)            | 2(1)            | 0(1)            |
| C(14)  | 28(5)           | 28(5)           | 28(5)           | 0(1)            | 2(1)            | 0(1)            |
| C(15)  | 39(9)           | 33(8)           | 43(9)           | 0(6)            | -13(6)          | 1(6)            |
| C(16)  | 23(4)           | 22(4)           | 22(4)           | 0(1)            | 2(1)            | 0(1)            |

|        |        |        |         |         |         |         |
|--------|--------|--------|---------|---------|---------|---------|
| C(17)  | 68(12) | 17(6)  | 40(9)   | -1(5)   | -8(7)   | -17(6)  |
| C(18)  | 47(9)  | 15(6)  | 33(8)   | 17(5)   | -4(6)   | -9(5)   |
| C(19)  | 27(5)  | 27(5)  | 27(5)   | 0(1)    | 2(1)    | 0(1)    |
| C(110) | 33(5)  | 33(5)  | 33(5)   | 0(1)    | 3(1)    | 0(1)    |
| C(111) | 33(9)  | 38(9)  | 26(8)   | 5(5)    | 3(5)    | -10(5)  |
| C(112) | 32(12) | 76(15) | 20(11)  | -7(10)  | 1(9)    | -16(10) |
| C(113) | 33(5)  | 33(5)  | 33(5)   | -1(1)   | 2(1)    | 0(1)    |
| C(114) | 27(5)  | 27(5)  | 27(5)   | 0(1)    | 2(1)    | 0(1)    |
| C(115) | 34(5)  | 34(5)  | 34(5)   | 0(1)    | 3(1)    | 0(1)    |
| C(116) | 26(4)  | 26(4)  | 26(4)   | 0(1)    | 2(1)    | 0(1)    |
| C(117) | 65(12) | 20(7)  | 46(10)  | -6(6)   | -8(7)   | -6(6)   |
| C(118) | 40(5)  | 40(5)  | 40(5)   | 0(1)    | 3(1)    | 0(1)    |
| C(119) | 63(12) | 58(11) | 31(8)   | 0(7)    | -2(7)   | -20(8)  |
| C(120) | 14(3)  | 14(3)  | 14(3)   | 0(1)    | 1(1)    | 0(1)    |
| C(121) | 20(4)  | 19(4)  | 19(4)   | 0(1)    | 1(1)    | 0(1)    |
| C(122) | 31(5)  | 31(5)  | 30(4)   | 0(1)    | 2(1)    | 0(1)    |
| C(123) | 36(5)  | 36(5)  | 36(5)   | 0(1)    | 3(1)    | 0(1)    |
| C(124) | 26(4)  | 25(4)  | 26(4)   | 0(1)    | 2(1)    | 0(1)    |
| C(125) | 66(15) | 24(10) | 35(11)  | -18(8)  | -19(9)  | -3(9)   |
| C(126) | 28(4)  | 27(4)  | 28(4)   | 0(1)    | 2(1)    | -1(1)   |
| C(127) | 46(5)  | 46(5)  | 46(5)   | 0(1)    | 4(1)    | 0(1)    |
| C(128) | 40(6)  | 40(6)  | 40(6)   | 0(1)    | 3(1)    | 0(1)    |
| C(129) | 19(10) | 71(14) | 14(10)  | 18(9)   | -5(8)   | -23(9)  |
| C(130) | 39(14) | 80(17) | 39(13)  | -24(11) | 16(10)  | -6(12)  |
| C(131) | 47(13) | 65(15) | 34(12)  | 18(11)  | -20(10) | -14(11) |
| C(132) | 41(13) | 81(17) | 32(13)  | 0(11)   | -10(10) | -25(11) |
| C(133) | 33(11) | 41(10) | 57(15)  | 3(9)    | -13(10) | -6(8)   |
| C(134) | 49(15) | 60(16) | 33(15)  | 3(12)   | 1(11)   | 13(12)  |
| C(135) | 32(5)  | 32(5)  | 32(5)   | 0(1)    | 3(1)    | 0(1)    |
| C(136) | 50(10) | 33(8)  | 39(9)   | -28(6)  | 5(6)    | 3(6)    |
| C(139) | 49(5)  | 49(5)  | 49(5)   | 0(1)    | 4(1)    | 1(1)    |
| C(141) | 86(16) | 89(15) | 130(20) | 15(13)  | -56(16) | 5(12)   |
| C(142) | 38(5)  | 38(5)  | 38(5)   | 0(1)    | 3(1)    | 0(1)    |
| C(143) | 26(11) | 80(15) | 36(14)  | 26(11)  | 1(10)   | 3(10)   |
| C(146) | 67(12) | 42(9)  | 31(8)   | 6(6)    | 35(7)   | 8(7)    |
| C(147) | 45(4)  | 45(4)  | 44(4)   | -1(1)   | 4(1)    | 0(1)    |
| C(21)  | 44(9)  | 34(8)  | 27(8)   | 14(6)   | 14(6)   | 13(6)   |
| C(22)  | 40(6)  | 40(6)  | 40(6)   | 1(1)    | 3(1)    | 0(1)    |
| C(23)  | 44(12) | 15(7)  | 40(13)  | 2(8)    | -3(9)   | -4(7)   |
| C(24)  | 27(5)  | 27(5)  | 26(5)   | 0(1)    | 2(1)    | 0(1)    |
| C(25)  | 29(8)  | 44(9)  | 27(8)   | -10(5)  | -7(5)   | 10(5)   |
| C(26)  | 51(10) | 25(7)  | 27(8)   | -4(5)   | -4(6)   | 12(6)   |
| C(27)  | 42(5)  | 42(5)  | 42(5)   | 0(1)    | 4(1)    | 0(1)    |
| C(28)  | 41(6)  | 40(6)  | 41(6)   | 0(1)    | 3(1)    | 0(1)    |
| C(29)  | 54(11) | 35(8)  | 68(12)  | -4(7)   | 9(7)    | 11(6)   |
| C(210) | 23(4)  | 23(4)  | 23(4)   | 0(1)    | 2(1)    | 0(1)    |
| C(211) | 20(7)  | 15(6)  | 24(7)   | 7(4)    | 1(5)    | 9(4)    |
| C(212) | 71(12) | 25(7)  | 50(11)  | 3(6)    | -11(8)  | 5(6)    |
| C(213) | 17(4)  | 17(4)  | 17(4)   | 0(1)    | 2(1)    | 0(1)    |
| C(214) | 40(5)  | 40(5)  | 39(5)   | 0(1)    | 3(1)    | 0(1)    |
| C(215) | 18(3)  | 18(3)  | 17(3)   | 0(1)    | 1(1)    | 0(1)    |
| C(216) | 40(9)  | 37(9)  | 31(8)   | 2(6)    | 9(6)    | 8(6)    |

|        |         |         |         |         |         |        |
|--------|---------|---------|---------|---------|---------|--------|
| C(217) | 15(4)   | 15(4)   | 15(4)   | 0(1)    | 1(1)    | 0(1)   |
| C(218) | 38(9)   | 30(7)   | 19(7)   | -2(5)   | 2(6)    | 20(5)  |
| C(219) | 27(4)   | 27(4)   | 27(4)   | 0(1)    | 2(1)    | 0(1)   |
| C(220) | 32(8)   | 29(7)   | 34(9)   | -4(5)   | -10(6)  | 9(5)   |
| C(221) | 25(8)   | 39(8)   | 57(10)  | 24(7)   | 10(6)   | 17(6)  |
| C(222) | 54(10)  | 18(6)   | 16(7)   | 7(5)    | -11(5)  | 10(5)  |
| C(223) | 60(15)  | 24(10)  | 38(14)  | 9(9)    | -10(11) | -4(9)  |
| C(224) | 36(12)  | 25(9)   | 53(13)  | -23(9)  | -11(10) | 5(8)   |
| C(225) | 40(13)  | 33(10)  | 82(18)  | -12(11) | -2(12)  | -14(9) |
| C(226) | 58(14)  | 33(10)  | 53(14)  | -37(9)  | 6(11)   | -13(9) |
| C(227) | 65(15)  | 73(16)  | 18(10)  | -6(10)  | 11(9)   | 18(12) |
| C(228) | 25(10)  | 36(11)  | 23(11)  | -5(9)   | 1(8)    | 7(8)   |
| C(229) | 46(9)   | 18(6)   | 15(6)   | -6(4)   | -8(5)   | 16(5)  |
| C(230) | 42(9)   | 21(6)   | 37(8)   | 2(5)    | 6(6)    | 10(5)  |
| C(231) | 39(9)   | 44(9)   | 48(10)  | -11(7)  | -7(7)   | 20(7)  |
| C(232) | 50(6)   | 50(6)   | 50(6)   | 0(1)    | 4(1)    | 1(1)   |
| C(233) | 57(14)  | 22(9)   | 60(14)  | 2(9)    | 34(10)  | 6(8)   |
| C(234) | 52(11)  | 37(9)   | 104(17) | 24(8)   | 2(9)    | 18(7)  |
| C(235) | 34(8)   | 29(7)   | 11(6)   | 1(4)    | -6(5)   | 3(5)   |
| C(236) | 35(5)   | 35(5)   | 35(5)   | 0(1)    | 3(1)    | 0(1)   |
| C(237) | 60(6)   | 59(6)   | 59(6)   | 0(1)    | 5(1)    | 0(1)   |
| C(239) | 54(13)  | 19(8)   | 33(12)  | 13(8)   | 15(10)  | 3(8)   |
| C(240) | 36(9)   | 84(13)  | 34(9)   | 2(8)    | 27(6)   | 36(8)  |
| C(241) | 65(16)  | 150(30) | 94(19)  | -4(16)  | 48(13)  | 65(16) |
| C(242) | 79(13)  | 32(8)   | 31(8)   | 9(6)    | 16(7)   | 7(7)   |
| C(243) | 51(6)   | 51(6)   | 51(6)   | 0(1)    | 4(1)    | 0(1)   |
| C(244) | 56(6)   | 57(6)   | 56(6)   | 0(1)    | 5(1)    | 0(1)   |
| C(246) | 47(5)   | 47(5)   | 47(5)   | 0(1)    | 4(1)    | -1(1)  |
| C(247) | 106(8)  | 106(8)  | 106(8)  | 0(1)    | 9(1)    | 0(1)   |
| O(1W)  | 85(7)   | 85(7)   | 85(7)   | 3(2)    | 5(2)    | -3(2)  |
| O(2W)  | 118(10) | 117(10) | 116(10) | -1(2)   | 11(2)   | -2(2)  |
| O(3W)  | 147(12) | 148(12) | 148(12) | 1(2)    | 11(2)   | 1(2)   |

---



Table 5. Hydrogen coordinates ( $\text{\AA} \times 10^4$ ) and isotropic displacement parameters ( $\text{\AA}^2 \times 10^3$ ) for Pd.

|        | x     | y    | z    | U(eq) |
|--------|-------|------|------|-------|
| H(12)  | 7866  | 2017 | 1129 | 55    |
| H(13)  | 7183  | 1273 | 1604 | 20    |
| H(17)  | 7311  | 534  | 3743 | 51    |
| H(18)  | 8123  | 842  | 4700 | 39    |
| H(112) | 9239  | 2881 | 5376 | 51    |
| H(113) | 8967  | 3773 | 4925 | 40    |
| H(117) | 8676  | 4514 | 3089 | 53    |
| H(118) | 8983  | 4554 | 2239 | 48    |
| H(119) | 9140  | 3767 | 1688 | 61    |
| H(22)  | 617   | 3761 | 3391 | 48    |
| H(23)  | 271   | 2821 | 2972 | 40    |
| H(27)  | 1569  | 897  | 3677 | 51    |
| H(28)  | 2115  | 535  | 4566 | 49    |
| H(212) | 2355  | 1317 | 6777 | 59    |
| H(213) | 1641  | 2032 | 7246 | 21    |
| H(217) | 330   | 3707 | 6659 | 18    |
| H(218) | 431   | 4549 | 6206 | 35    |
| H(219) | 948   | 4539 | 5216 | 32    |
| H(24A) | -2024 | 3091 | 7265 | 60    |
| H(24B) | -1713 | 3655 | 6994 | 60    |
| H(24C) | -1708 | 3383 | 8192 | 152   |
| H(24D) | -1975 | 3956 | 7895 | 152   |
| H(24E) | -1064 | 3809 | 8002 | 152   |

Table 6. Torsion angles [°] for Pd.

|                           |            |
|---------------------------|------------|
| N(13)-Pd(1)-N(11)-C(11)   | 173(14)    |
| C(121)-Pd(1)-N(11)-C(11)  | 18.1(16)   |
| N(12)-Pd(1)-N(11)-C(11)   | -163.7(16) |
| N(13)-Pd(1)-N(11)-C(14)   | -2(16)     |
| C(121)-Pd(1)-N(11)-C(14)  | -156.3(14) |
| N(12)-Pd(1)-N(11)-C(14)   | 21.9(14)   |
| N(13)-Pd(1)-N(12)-C(16)   | 164.1(17)  |
| N(11)-Pd(1)-N(12)-C(16)   | -14.8(17)  |
| C(121)-Pd(1)-N(12)-C(16)  | 109(19)    |
| N(13)-Pd(1)-N(12)-C(19)   | -14.9(18)  |
| N(11)-Pd(1)-N(12)-C(19)   | 166.2(18)  |
| C(121)-Pd(1)-N(12)-C(19)  | -70(19)    |
| N(11)-Pd(1)-N(13)-C(114)  | -135(14)   |
| C(121)-Pd(1)-N(13)-C(114) | 19.7(18)   |
| N(12)-Pd(1)-N(13)-C(114)  | -158.5(17) |
| N(11)-Pd(1)-N(13)-C(111)  | 50(16)     |
| C(121)-Pd(1)-N(13)-C(111) | -155(2)    |
| N(12)-Pd(1)-N(13)-C(111)  | 26(2)      |
| C(221)-Pd(2)-N(21)-C(21)  | 24.4(17)   |
| N(23)-Pd(2)-N(21)-C(21)   | -138(28)   |
| N(22)-Pd(2)-N(21)-C(21)   | -156.1(16) |
| C(221)-Pd(2)-N(21)-C(24)  | -157.5(16) |
| N(23)-Pd(2)-N(21)-C(24)   | 41(29)     |
| N(22)-Pd(2)-N(21)-C(24)   | 22.0(16)   |
| C(221)-Pd(2)-N(22)-C(26)  | 38(86)     |
| N(23)-Pd(2)-N(22)-C(26)   | 168.5(19)  |
| N(21)-Pd(2)-N(22)-C(26)   | -12.0(19)  |
| C(221)-Pd(2)-N(22)-C(29)  | -150(85)   |
| N(23)-Pd(2)-N(22)-C(29)   | -19.9(19)  |
| N(21)-Pd(2)-N(22)-C(29)   | 159.6(19)  |
| C(221)-Pd(2)-N(23)-C(214) | 15(2)      |
| N(21)-Pd(2)-N(23)-C(214)  | 177(100)   |
| N(22)-Pd(2)-N(23)-C(214)  | -164.4(19) |
| C(221)-Pd(2)-N(23)-C(211) | -155.6(17) |
| N(21)-Pd(2)-N(23)-C(211)  | 6(29)      |
| N(22)-Pd(2)-N(23)-C(211)  | 24.9(16)   |
| C(14)-N(11)-C(11)-C(122)  | -163.4(16) |
| Pd(1)-N(11)-C(11)-C(122)  | 22(2)      |
| C(14)-N(11)-C(11)-C(12)   | 4(2)       |
| Pd(1)-N(11)-C(11)-C(12)   | -170.9(13) |
| N(11)-C(11)-C(12)-C(13)   | -4(2)      |
| C(122)-C(11)-C(12)-C(13)  | 161.8(19)  |
| C(11)-C(12)-C(13)-C(14)   | 2(2)       |
| C(12)-C(13)-C(14)-C(15)   | -169(2)    |
| C(12)-C(13)-C(14)-N(11)   | 1(2)       |
| C(11)-N(11)-C(14)-C(15)   | 168(2)     |
| Pd(1)-N(11)-C(14)-C(15)   | -17(3)     |
| C(11)-N(11)-C(14)-C(13)   | -3(2)      |
| Pd(1)-N(11)-C(14)-C(13)   | 172.2(12)  |
| C(13)-C(14)-C(15)-C(16)   | 164(2)     |

|                             |            |
|-----------------------------|------------|
| N(11)-C(14)-C(15)-C(16)     | -5(4)      |
| C(13)-C(14)-C(15)-C(123)    | -6(3)      |
| N(11)-C(14)-C(15)-C(123)    | -174.4(18) |
| C(19)-N(12)-C(16)-C(15)     | -179.8(18) |
| Pd(1)-N(12)-C(16)-C(15)     | 1(3)       |
| C(19)-N(12)-C(16)-C(17)     | 5(2)       |
| Pd(1)-N(12)-C(16)-C(17)     | -174.5(15) |
| C(14)-C(15)-C(16)-N(12)     | 13(4)      |
| C(123)-C(15)-C(16)-N(12)    | -176.2(18) |
| C(14)-C(15)-C(16)-C(17)     | -172(2)    |
| C(123)-C(15)-C(16)-C(17)    | -1(3)      |
| N(12)-C(16)-C(17)-C(18)     | -7(2)      |
| C(15)-C(16)-C(17)-C(18)     | 177.9(19)  |
| C(16)-C(17)-C(18)-C(19)     | 6(2)       |
| C(16)-N(12)-C(19)-C(18)     | -1(2)      |
| Pd(1)-N(12)-C(19)-C(18)     | 178.4(14)  |
| C(16)-N(12)-C(19)-C(110)    | -175.2(18) |
| Pd(1)-N(12)-C(19)-C(110)    | 4(3)       |
| C(17)-C(18)-C(19)-N(12)     | -3(2)      |
| C(17)-C(18)-C(19)-C(110)    | 171(2)     |
| N(12)-C(19)-C(110)-C(111)   | 6(4)       |
| C(18)-C(19)-C(110)-C(111)   | -168(2)    |
| N(12)-C(19)-C(110)-C(129)   | -178.3(18) |
| C(18)-C(19)-C(110)-C(129)   | 8(3)       |
| C(19)-C(110)-C(111)-N(13)   | 4(4)       |
| C(129)-C(110)-C(111)-N(13)  | -172.1(19) |
| C(19)-C(110)-C(111)-C(112)  | 163(2)     |
| C(129)-C(110)-C(111)-C(112) | -13(4)     |
| C(114)-N(13)-C(111)-C(110)  | 159(2)     |
| Pd(1)-N(13)-C(111)-C(110)   | -25(3)     |
| C(114)-N(13)-C(111)-C(112)  | -5(2)      |
| Pd(1)-N(13)-C(111)-C(112)   | 171.4(14)  |
| C(110)-C(111)-C(112)-C(113) | -158(2)    |
| N(13)-C(111)-C(112)-C(113)  | 2(3)       |
| C(111)-C(112)-C(113)-C(114) | 2(3)       |
| C(112)-C(113)-C(114)-N(13)  | -5(3)      |
| C(112)-C(113)-C(114)-C(115) | 173(2)     |
| C(111)-N(13)-C(114)-C(113)  | 6(2)       |
| Pd(1)-N(13)-C(114)-C(113)   | -170.4(14) |
| C(111)-N(13)-C(114)-C(115)  | -172.3(18) |
| Pd(1)-N(13)-C(114)-C(115)   | 11(3)      |
| C(113)-C(114)-C(115)-C(135) | -50(3)     |
| N(13)-C(114)-C(115)-C(135)  | 128(2)     |
| C(113)-C(114)-C(115)-C(116) | 132(2)     |
| N(13)-C(114)-C(115)-C(116)  | -50(2)     |
| C(135)-C(115)-C(116)-C(117) | 45(3)      |
| C(114)-C(115)-C(116)-C(117) | -137.0(19) |
| C(135)-C(115)-C(116)-C(121) | -129(2)    |
| C(114)-C(115)-C(116)-C(121) | 48(3)      |
| C(121)-C(116)-C(117)-C(118) | 1(3)       |
| C(115)-C(116)-C(117)-C(118) | -174(2)    |
| C(116)-C(117)-C(118)-C(119) | -3(4)      |

|                             |            |
|-----------------------------|------------|
| C(117)-C(118)-C(119)-C(120) | 0(3)       |
| C(118)-C(119)-C(120)-C(121) | 5(3)       |
| C(118)-C(119)-C(120)-C(122) | 175.0(17)  |
| C(117)-C(116)-C(121)-C(120) | 4(3)       |
| C(115)-C(116)-C(121)-C(120) | 178.6(17)  |
| C(117)-C(116)-C(121)-Pd(1)  | 177.6(14)  |
| C(115)-C(116)-C(121)-Pd(1)  | -8(3)      |
| C(119)-C(120)-C(121)-C(116) | -7(2)      |
| C(122)-C(120)-C(121)-C(116) | -175.7(16) |
| C(119)-C(120)-C(121)-Pd(1)  | 179.4(13)  |
| C(122)-C(120)-C(121)-Pd(1)  | 10(2)      |
| N(13)-Pd(1)-C(121)-C(116)   | -22.7(15)  |
| N(11)-Pd(1)-C(121)-C(116)   | 156.2(15)  |
| N(12)-Pd(1)-C(121)-C(116)   | 32(20)     |
| N(13)-Pd(1)-C(121)-C(120)   | 151.1(13)  |
| N(11)-Pd(1)-C(121)-C(120)   | -30.1(13)  |
| N(12)-Pd(1)-C(121)-C(120)   | -154(18)   |
| N(11)-C(11)-C(122)-C(142)   | 138(2)     |
| C(12)-C(11)-C(122)-C(142)   | -26(3)     |
| N(11)-C(11)-C(122)-C(120)   | -52(2)     |
| C(12)-C(11)-C(122)-C(120)   | 143.7(19)  |
| C(121)-C(120)-C(122)-C(11)  | 36(2)      |
| C(119)-C(120)-C(122)-C(11)  | -133.1(17) |
| C(121)-C(120)-C(122)-C(142) | -153.1(17) |
| C(119)-C(120)-C(122)-C(142) | 38(2)      |
| C(14)-C(15)-C(123)-C(124)   | 78(3)      |
| C(16)-C(15)-C(123)-C(124)   | -93(3)     |
| C(14)-C(15)-C(123)-C(128)   | -92(3)     |
| C(16)-C(15)-C(123)-C(128)   | 97(2)      |
| C(128)-C(123)-C(124)-F(15)  | 173.7(19)  |
| C(15)-C(123)-C(124)-F(15)   | 4(3)       |
| C(128)-C(123)-C(124)-C(125) | -4(3)      |
| C(15)-C(123)-C(124)-C(125)  | -174.3(18) |
| C(123)-C(124)-C(125)-F(14)  | -178(2)    |
| F(15)-C(124)-C(125)-F(14)   | 4(3)       |
| C(123)-C(124)-C(125)-C(126) | -2(3)      |
| F(15)-C(124)-C(125)-C(126)  | -180.0(17) |
| F(14)-C(125)-C(126)-C(127)  | 178(2)     |
| C(124)-C(125)-C(126)-C(127) | 2(3)       |
| F(14)-C(125)-C(126)-F(13)   | -13(3)     |
| C(124)-C(125)-C(126)-F(13)  | 170.6(15)  |
| C(125)-C(126)-C(127)-C(128) | 5(3)       |
| F(13)-C(126)-C(127)-C(128)  | -164.2(18) |
| C(125)-C(126)-C(127)-F(12)  | 171.1(19)  |
| F(13)-C(126)-C(127)-F(12)   | 2(3)       |
| C(124)-C(123)-C(128)-F(11)  | 179.8(19)  |
| C(15)-C(123)-C(128)-F(11)   | -10(3)     |
| C(124)-C(123)-C(128)-C(127) | 11(3)      |
| C(15)-C(123)-C(128)-C(127)  | -179(2)    |
| C(126)-C(127)-C(128)-C(123) | -11(3)     |
| F(12)-C(127)-C(128)-C(123)  | -178.4(19) |
| C(126)-C(127)-C(128)-F(11)  | 179.8(18)  |

|                             |            |
|-----------------------------|------------|
| F(12)-C(127)-C(128)-F(11)   | 13(3)      |
| C(111)-C(110)-C(129)-C(130) | -117(3)    |
| C(19)-C(110)-C(129)-C(130)  | 66(3)      |
| C(111)-C(110)-C(129)-C(134) | 69(3)      |
| C(19)-C(110)-C(129)-C(134)  | -108(2)    |
| C(134)-C(129)-C(130)-C(131) | 0(3)       |
| C(110)-C(129)-C(130)-C(131) | -174(2)    |
| C(134)-C(129)-C(130)-F(16)  | -177.4(18) |
| C(110)-C(129)-C(130)-F(16)  | 8(3)       |
| C(129)-C(130)-C(131)-F(17)  | 174(2)     |
| F(16)-C(130)-C(131)-F(17)   | -8(3)      |
| C(129)-C(130)-C(131)-C(132) | 4(4)       |
| F(16)-C(130)-C(131)-C(132)  | -178.2(19) |
| C(130)-C(131)-C(132)-F(18)  | 170.2(19)  |
| F(17)-C(131)-C(132)-F(18)   | 0(3)       |
| C(130)-C(131)-C(132)-C(133) | -4(3)      |
| F(17)-C(131)-C(132)-C(133)  | -174(2)    |
| C(131)-C(132)-C(133)-C(134) | 0(3)       |
| F(18)-C(132)-C(133)-C(134)  | -175(2)    |
| C(131)-C(132)-C(133)-F(19)  | 179.5(19)  |
| F(18)-C(132)-C(133)-F(19)   | 5(3)       |
| F(19)-C(133)-C(134)-F(110)  | -3(4)      |
| C(132)-C(133)-C(134)-F(110) | 176.7(19)  |
| F(19)-C(133)-C(134)-C(129)  | -175(2)    |
| C(132)-C(133)-C(134)-C(129) | 5(4)       |
| C(130)-C(129)-C(134)-C(133) | -5(3)      |
| C(110)-C(129)-C(134)-C(133) | 170(2)     |
| C(130)-C(129)-C(134)-F(110) | -176(2)    |
| C(110)-C(129)-C(134)-F(110) | -1(3)      |
| C(116)-C(115)-C(135)-C(136) | -175(2)    |
| C(114)-C(115)-C(135)-C(136) | 8(3)       |
| C(116)-C(115)-C(135)-C(139) | 6(4)       |
| C(114)-C(115)-C(135)-C(139) | -172.0(17) |
| C(337)-O(12)-C(136)-O(11)   | 11(3)      |
| C(137)-O(12)-C(136)-O(11)   | -15(3)     |
| C(337)-O(12)-C(136)-C(135)  | -165.4(16) |
| C(137)-O(12)-C(136)-C(135)  | 168.4(18)  |
| C(115)-C(135)-C(136)-O(11)  | 114(3)     |
| C(139)-C(135)-C(136)-O(11)  | -66(3)     |
| C(115)-C(135)-C(136)-O(12)  | -69(3)     |
| C(139)-C(135)-C(136)-O(12)  | 110.8(18)  |
| C(136)-O(12)-C(137)-C(337)  | 87(4)      |
| C(136)-O(12)-C(137)-C(138)  | 160(2)     |
| C(337)-O(12)-C(137)-C(138)  | 73(4)      |
| C(136)-O(12)-C(137)-C(438)  | 143(2)     |
| C(337)-O(12)-C(137)-C(438)  | 56(3)      |
| O(12)-C(137)-C(337)-C(138)  | 105(2)     |
| C(438)-C(137)-C(337)-C(138) | 3(3)       |
| C(138)-C(137)-C(337)-O(12)  | -105(2)    |
| C(438)-C(137)-C(337)-O(12)  | -102(2)    |
| O(12)-C(137)-C(337)-C(438)  | 102(2)     |
| C(138)-C(137)-C(337)-C(438) | -3(3)      |

|                             |            |
|-----------------------------|------------|
| C(136)-O(12)-C(337)-C(137)  | -103(3)    |
| C(136)-O(12)-C(337)-C(138)  | -178(2)    |
| C(137)-O(12)-C(337)-C(138)  | -75(3)     |
| C(136)-O(12)-C(337)-C(438)  | 159(2)     |
| C(137)-O(12)-C(337)-C(438)  | -98(4)     |
| C(137)-C(337)-C(138)-C(438) | -172(8)    |
| O(12)-C(337)-C(138)-C(438)  | -98(8)     |
| O(12)-C(337)-C(138)-C(137)  | 74.6(12)   |
| C(438)-C(337)-C(138)-C(137) | 172(8)     |
| C(337)-C(137)-C(138)-C(438) | 8(8)       |
| O(12)-C(137)-C(138)-C(438)  | -66(8)     |
| O(12)-C(137)-C(138)-C(337)  | -74.0(12)  |
| C(438)-C(137)-C(138)-C(337) | -8(8)      |
| C(137)-C(138)-C(438)-C(337) | -3(3)      |
| C(337)-C(138)-C(438)-C(137) | 3(3)       |
| C(137)-C(337)-C(438)-C(138) | 8(8)       |
| O(12)-C(337)-C(438)-C(138)  | 88(8)      |
| C(138)-C(337)-C(438)-C(137) | -8(8)      |
| O(12)-C(337)-C(438)-C(137)  | 79.8(14)   |
| C(337)-C(137)-C(438)-C(138) | -171(9)    |
| O(12)-C(137)-C(438)-C(138)  | 116(8)     |
| O(12)-C(137)-C(438)-C(337)  | -72.9(14)  |
| C(138)-C(137)-C(438)-C(337) | 171(9)     |
| C(340)-O(14)-C(139)-O(33)   | 2(4)       |
| C(140)-O(14)-C(139)-O(33)   | -11(3)     |
| C(340)-O(14)-C(139)-O(13)   | -14(5)     |
| C(140)-O(14)-C(139)-O(13)   | -27(4)     |
| C(340)-O(14)-C(139)-C(135)  | -154(3)    |
| C(140)-O(14)-C(139)-C(135)  | -167.7(18) |
| C(115)-C(135)-C(139)-O(33)  | -111(3)    |
| C(136)-C(135)-C(139)-O(33)  | 69(3)      |
| C(115)-C(135)-C(139)-O(13)  | -103(4)    |
| C(136)-C(135)-C(139)-O(13)  | 78(4)      |
| C(115)-C(135)-C(139)-O(14)  | 46(3)      |
| C(136)-C(135)-C(139)-O(14)  | -133.5(19) |
| C(139)-O(14)-C(140)-C(141)  | -142(2)    |
| C(340)-O(14)-C(140)-C(141)  | 79.7(19)   |
| C(139)-O(14)-C(340)-C(141)  | -127(3)    |
| C(140)-O(14)-C(340)-C(141)  | -79.6(19)  |
| O(14)-C(140)-C(141)-C(340)  | -79.6(19)  |
| O(14)-C(340)-C(141)-C(140)  | 79.7(19)   |
| C(11)-C(122)-C(142)-C(143)  | -168(2)    |
| C(120)-C(122)-C(142)-C(143) | 23(3)      |
| C(11)-C(122)-C(142)-C(146)  | 8(3)       |
| C(120)-C(122)-C(142)-C(146) | -161.1(17) |
| C(344)-O(16)-C(143)-O(15)   | -6(6)      |
| C(144)-O(16)-C(143)-O(15)   | -5(4)      |
| C(344)-O(16)-C(143)-C(142)  | -175(5)    |
| C(144)-O(16)-C(143)-C(142)  | -174(3)    |
| C(122)-C(142)-C(143)-O(15)  | 41(4)      |
| C(146)-C(142)-C(143)-O(15)  | -135(3)    |
| C(122)-C(142)-C(143)-O(16)  | -151(2)    |

|                            |            |
|----------------------------|------------|
| C(146)-C(142)-C(143)-O(16) | 33(3)      |
| C(143)-O(16)-C(144)-C(145) | -167(3)    |
| C(344)-O(16)-C(144)-C(145) | 5(39)      |
| C(143)-O(16)-C(344)-C(345) | -174(4)    |
| C(144)-O(16)-C(344)-C(345) | 177(46)    |
| C(147)-O(18)-C(146)-O(17)  | 11(3)      |
| C(147)-O(18)-C(146)-C(142) | 177.3(16)  |
| C(122)-C(142)-C(146)-O(17) | -101(2)    |
| C(143)-C(142)-C(146)-O(17) | 75(3)      |
| C(122)-C(142)-C(146)-O(18) | 91(2)      |
| C(143)-C(142)-C(146)-O(18) | -93(2)     |
| C(146)-O(18)-C(147)-C(448) | 151(3)     |
| C(146)-O(18)-C(147)-C(148) | 175(2)     |
| O(18)-C(147)-C(148)-C(448) | -93(8)     |
| O(18)-C(147)-C(448)-C(148) | 94(8)      |
| C(24)-N(21)-C(21)-C(222)   | -165(2)    |
| Pd(2)-N(21)-C(21)-C(222)   | 13(3)      |
| C(24)-N(21)-C(21)-C(22)    | 9(2)       |
| Pd(2)-N(21)-C(21)-C(22)    | -172.5(12) |
| N(21)-C(21)-C(22)-C(23)    | -4(2)      |
| C(222)-C(21)-C(22)-C(23)   | 171(2)     |
| C(21)-C(22)-C(23)-C(24)    | -3(2)      |
| C(21)-N(21)-C(24)-C(25)    | 157(3)     |
| Pd(2)-N(21)-C(24)-C(25)    | -21(3)     |
| C(21)-N(21)-C(24)-C(23)    | -11(3)     |
| Pd(2)-N(21)-C(24)-C(23)    | 170.5(13)  |
| C(22)-C(23)-C(24)-C(25)    | -161(2)    |
| C(22)-C(23)-C(24)-N(21)    | 8(3)       |
| N(21)-C(24)-C(25)-C(26)    | 0(4)       |
| C(23)-C(24)-C(25)-C(26)    | 167(2)     |
| N(21)-C(24)-C(25)-C(223)   | -172(2)    |
| C(23)-C(24)-C(25)-C(223)   | -6(4)      |
| C(29)-N(22)-C(26)-C(25)    | -175(2)    |
| Pd(2)-N(22)-C(26)-C(25)    | -2(3)      |
| C(29)-N(22)-C(26)-C(27)    | 1(2)       |
| Pd(2)-N(22)-C(26)-C(27)    | 174.2(13)  |
| C(24)-C(25)-C(26)-N(22)    | 13(4)      |
| C(223)-C(25)-C(26)-N(22)   | -174(2)    |
| C(24)-C(25)-C(26)-C(27)    | -163(2)    |
| C(223)-C(25)-C(26)-C(27)   | 10(3)      |
| N(22)-C(26)-C(27)-C(28)    | 2(3)       |
| C(25)-C(26)-C(27)-C(28)    | 178(2)     |
| C(26)-C(27)-C(28)-C(29)    | -4(3)      |
| C(26)-N(22)-C(29)-C(28)    | -4(3)      |
| Pd(2)-N(22)-C(29)-C(28)    | -176.3(15) |
| C(26)-N(22)-C(29)-C(210)   | -176(2)    |
| Pd(2)-N(22)-C(29)-C(210)   | 11(3)      |
| C(27)-C(28)-C(29)-N(22)    | 5(3)       |
| C(27)-C(28)-C(29)-C(210)   | 177(2)     |
| N(22)-C(29)-C(210)-C(229)  | -175(2)    |
| C(28)-C(29)-C(210)-C(229)  | 14(4)      |
| N(22)-C(29)-C(210)-C(211)  | 2(4)       |

|                             |            |
|-----------------------------|------------|
| C(28)-C(29)-C(210)-C(211)   | -169(2)    |
| C(214)-N(23)-C(211)-C(212)  | -6(2)      |
| Pd(2)-N(23)-C(211)-C(212)   | 167.0(14)  |
| C(214)-N(23)-C(211)-C(210)  | 165.9(18)  |
| Pd(2)-N(23)-C(211)-C(210)   | -21(3)     |
| C(29)-C(210)-C(211)-N(23)   | 3(3)       |
| C(229)-C(210)-C(211)-N(23)  | -179.8(18) |
| C(29)-C(210)-C(211)-C(212)  | 174(2)     |
| C(229)-C(210)-C(211)-C(212) | -10(3)     |
| N(23)-C(211)-C(212)-C(213)  | 3(2)       |
| C(210)-C(211)-C(212)-C(213) | -168.3(17) |
| C(211)-C(212)-C(213)-C(214) | 1(2)       |
| C(211)-N(23)-C(214)-C(213)  | 7(2)       |
| Pd(2)-N(23)-C(214)-C(213)   | -165.7(14) |
| C(211)-N(23)-C(214)-C(215)  | -177.0(17) |
| Pd(2)-N(23)-C(214)-C(215)   | 11(3)      |
| C(212)-C(213)-C(214)-N(23)  | -5(2)      |
| C(212)-C(213)-C(214)-C(215) | 179(2)     |
| N(23)-C(214)-C(215)-C(235)  | 137.1(19)  |
| C(213)-C(214)-C(215)-C(235) | -47(3)     |
| N(23)-C(214)-C(215)-C(216)  | -41(3)     |
| C(213)-C(214)-C(215)-C(216) | 135(2)     |
| C(235)-C(215)-C(216)-C(217) | 35(3)      |
| C(214)-C(215)-C(216)-C(217) | -147.8(17) |
| C(235)-C(215)-C(216)-C(221) | -143.5(18) |
| C(214)-C(215)-C(216)-C(221) | 34(2)      |
| C(221)-C(216)-C(217)-C(218) | -7(3)      |
| C(215)-C(216)-C(217)-C(218) | 175.0(16)  |
| C(216)-C(217)-C(218)-C(219) | 0(3)       |
| C(217)-C(218)-C(219)-C(220) | 0(2)       |
| C(218)-C(219)-C(220)-C(221) | 8(3)       |
| C(218)-C(219)-C(220)-C(222) | 176.2(14)  |
| C(219)-C(220)-C(221)-C(216) | -14(3)     |
| C(222)-C(220)-C(221)-C(216) | 179.2(16)  |
| C(219)-C(220)-C(221)-Pd(2)  | 175.1(15)  |
| C(222)-C(220)-C(221)-Pd(2)  | 8(2)       |
| C(217)-C(216)-C(221)-C(220) | 13(3)      |
| C(215)-C(216)-C(221)-C(220) | -169.1(16) |
| C(217)-C(216)-C(221)-Pd(2)  | -176.4(16) |
| C(215)-C(216)-C(221)-Pd(2)  | 2(3)       |
| N(23)-Pd(2)-C(221)-C(220)   | 148.2(16)  |
| N(21)-Pd(2)-C(221)-C(220)   | -31.4(16)  |
| N(22)-Pd(2)-C(221)-C(220)   | -81(86)    |
| N(23)-Pd(2)-C(221)-C(216)   | -21.4(18)  |
| N(21)-Pd(2)-C(221)-C(216)   | 159.1(18)  |
| N(22)-Pd(2)-C(221)-C(216)   | 109(85)    |
| N(21)-C(21)-C(222)-C(242)   | 133(2)     |
| C(22)-C(21)-C(222)-C(242)   | -41(3)     |
| N(21)-C(21)-C(222)-C(220)   | -50(3)     |
| C(22)-C(21)-C(222)-C(220)   | 137(2)     |
| C(221)-C(220)-C(222)-C(242) | -145(2)    |
| C(219)-C(220)-C(222)-C(242) | 46(2)      |



|                             |            |
|-----------------------------|------------|
| C(221)-C(220)-C(222)-C(21)  | 37(2)      |
| C(219)-C(220)-C(222)-C(21)  | -131.7(18) |
| C(24)-C(25)-C(223)-C(224)   | -118(3)    |
| C(26)-C(25)-C(223)-C(224)   | 69(3)      |
| C(24)-C(25)-C(223)-C(228)   | 70(3)      |
| C(26)-C(25)-C(223)-C(228)   | -103(2)    |
| C(228)-C(223)-C(224)-F(21)  | 177.9(18)  |
| C(25)-C(223)-C(224)-F(21)   | 6(3)       |
| C(228)-C(223)-C(224)-C(225) | 2(3)       |
| C(25)-C(223)-C(224)-C(225)  | -170.2(19) |
| F(21)-C(224)-C(225)-F(22)   | 6(3)       |
| C(223)-C(224)-C(225)-F(22)  | -178.4(18) |
| F(21)-C(224)-C(225)-C(226)  | -179(2)    |
| C(223)-C(224)-C(225)-C(226) | -3(3)      |
| F(22)-C(225)-C(226)-C(227)  | 177(2)     |
| C(224)-C(225)-C(226)-C(227) | 1(4)       |
| F(22)-C(225)-C(226)-F(23)   | -3(3)      |
| C(224)-C(225)-C(226)-F(23)  | -178.4(19) |
| F(23)-C(226)-C(227)-F(24)   | -1(4)      |
| C(225)-C(226)-C(227)-F(24)  | 180(2)     |
| F(23)-C(226)-C(227)-C(228)  | -179.4(19) |
| C(225)-C(226)-C(227)-C(228) | 1(4)       |
| C(224)-C(223)-C(228)-F(25)  | -177.7(17) |
| C(25)-C(223)-C(228)-F(25)   | -5(3)      |
| C(224)-C(223)-C(228)-C(227) | 0(3)       |
| C(25)-C(223)-C(228)-C(227)  | 172.2(18)  |
| C(226)-C(227)-C(228)-F(25)  | 176(2)     |
| F(24)-C(227)-C(228)-F(25)   | -3(3)      |
| C(226)-C(227)-C(228)-C(223) | -2(3)      |
| F(24)-C(227)-C(228)-C(223)  | 179.6(18)  |
| C(29)-C(210)-C(229)-C(230)  | 80(3)      |
| C(211)-C(210)-C(229)-C(230) | -98(2)     |
| C(29)-C(210)-C(229)-C(234)  | -98(3)     |
| C(211)-C(210)-C(229)-C(234) | 85(2)      |
| C(234)-C(229)-C(230)-F(26)  | -176(2)    |
| C(210)-C(229)-C(230)-F(26)  | 7(3)       |
| C(234)-C(229)-C(230)-C(231) | -8(3)      |
| C(210)-C(229)-C(230)-C(231) | 174.4(19)  |
| F(26)-C(230)-C(231)-F(37)   | -25(3)     |
| C(229)-C(230)-C(231)-F(37)  | 166(2)     |
| F(26)-C(230)-C(231)-F(27)   | 1(3)       |
| C(229)-C(230)-C(231)-F(27)  | -168(2)    |
| F(26)-C(230)-C(231)-C(232)  | 176.8(18)  |
| C(229)-C(230)-C(231)-C(232) | 8(3)       |
| F(37)-C(231)-C(232)-F(28)   | 6(3)       |
| F(27)-C(231)-C(232)-F(28)   | -19(3)     |
| C(230)-C(231)-C(232)-F(28)  | 164.5(19)  |
| F(37)-C(231)-C(232)-C(233)  | -161(2)    |
| F(27)-C(231)-C(232)-C(233)  | 174.4(19)  |
| C(230)-C(231)-C(232)-C(233) | -2(3)      |
| F(28)-C(232)-C(233)-C(234)  | -171(2)    |
| C(231)-C(232)-C(233)-C(234) | -3(3)      |

|                             |            |
|-----------------------------|------------|
| F(28)-C(232)-C(233)-F(29)   | 15(3)      |
| C(231)-C(232)-C(233)-F(29)  | -177.6(19) |
| F(29)-C(233)-C(234)-F(210)  | -8(4)      |
| C(232)-C(233)-C(234)-F(210) | 178(2)     |
| F(29)-C(233)-C(234)-C(229)  | 177(2)     |
| C(232)-C(233)-C(234)-C(229) | 3(4)       |
| C(230)-C(229)-C(234)-F(210) | -172(2)    |
| C(210)-C(229)-C(234)-F(210) | 5(3)       |
| C(230)-C(229)-C(234)-C(233) | 3(3)       |
| C(210)-C(229)-C(234)-C(233) | 180(2)     |
| C(216)-C(215)-C(235)-C(236) | -165(2)    |
| C(214)-C(215)-C(235)-C(236) | 17(3)      |
| C(216)-C(215)-C(235)-C(239) | 20(3)      |
| C(214)-C(215)-C(235)-C(239) | -157.3(16) |
| C(237)-O(22)-C(236)-O(21)   | -13(4)     |
| C(237)-O(22)-C(236)-C(235)  | 178.2(18)  |
| C(215)-C(235)-C(236)-O(21)  | -91(3)     |
| C(239)-C(235)-C(236)-O(21)  | 84(3)      |
| C(215)-C(235)-C(236)-O(22)  | 78(3)      |
| C(239)-C(235)-C(236)-O(22)  | -107.5(18) |
| C(236)-O(22)-C(237)-C(238)  | -178(2)    |
| C(236)-O(22)-C(237)-C(338)  | -154(2)    |
| C(240)-O(24)-C(239)-O(23)   | 3(3)       |
| C(240)-O(24)-C(239)-C(235)  | -171.8(16) |
| C(215)-C(235)-C(239)-O(23)  | 46(3)      |
| C(236)-C(235)-C(239)-O(23)  | -130(2)    |
| C(215)-C(235)-C(239)-O(24)  | -139.5(17) |
| C(236)-C(235)-C(239)-O(24)  | 45(2)      |
| C(239)-O(24)-C(240)-C(241)  | -165.6(18) |
| C(21)-C(222)-C(242)-C(246)  | 176.1(19)  |
| C(220)-C(222)-C(242)-C(246) | -1(3)      |
| C(21)-C(222)-C(242)-C(243)  | -4(3)      |
| C(220)-C(222)-C(242)-C(243) | 178.4(19)  |
| C(244)-O(26)-C(243)-O(25)   | -10(4)     |
| C(244)-O(26)-C(243)-C(242)  | 172.0(17)  |
| C(222)-C(242)-C(243)-O(25)  | 120(3)     |
| C(246)-C(242)-C(243)-O(25)  | -60(3)     |
| C(222)-C(242)-C(243)-O(26)  | -62(3)     |
| C(246)-C(242)-C(243)-O(26)  | 118(2)     |
| C(243)-O(26)-C(244)-C(245)  | 171(3)     |
| C(243)-O(26)-C(244)-C(445)  | -179(3)    |
| C(247)-O(28)-C(246)-O(27)   | 43(2)      |
| C(247)-O(28)-C(246)-O(37)   | 4(3)       |
| C(247)-O(28)-C(246)-C(242)  | 172.9(19)  |
| C(222)-C(242)-C(246)-O(27)  | -173(2)    |
| C(243)-C(242)-C(246)-O(27)  | 8(3)       |
| C(222)-C(242)-C(246)-O(37)  | -115(3)    |
| C(243)-C(242)-C(246)-O(37)  | 65(3)      |
| C(222)-C(242)-C(246)-O(28)  | 75(3)      |
| C(243)-C(242)-C(246)-O(28)  | -105(2)    |
| C(246)-O(28)-C(247)-C(248)  | -170(4)    |
| C(246)-O(28)-C(247)-C(348)  | 64(3)      |

---

Symmetry transformations used to generate equivalent atoms:
